# Supplementary material for: Perturbation of the yeast mitochondrial lipidome and associated membrane proteins following heterologous expression of Artemia-ANT
Source: PubMed Central journal article supplement (PMC5897331; doi:10.1038/s41598-018-24305-2), 2018-04-12
Supplement: 41598_2018_24305_MOESM1_ESM.pdf [file 41598_2018_24305_MOESM1_ESM.pdf]

Perturbation of the yeast mitochondrial lipidome and associated membrane proteins following heterologous expression of Artemia-ANT

Emily Chen<sup>1</sup>, Michael A. Kiebish<sup>1</sup>, Justice McDaniel<sup>1</sup>, Katarzyna Niedzwiecka<sup>2</sup>, Roza Kucharczyk<sup>2</sup>, Dora Ravasz<sup>3,4</sup>, Fei Gao<sup>1</sup>, Niven R. Narain<sup>1</sup>, Rangaprasad Sarangarajan<sup>1</sup>, Thomas N. Seyfried<sup>5</sup>, Vera Adam-Vizi<sup>3,6</sup> and Christos Chinopoulos<sup>\*3,4</sup>

<sup>1</sup>BERG LLC, Framingham, MA 01701, USA

<sup>2</sup>Institute of Biochemistry and Biophysics, Polish Academy of Sciences, Warsaw, 02-106, Poland

<sup>3</sup>Department of Medical Biochemistry, Semmelweis University, Budapest, 1094, Hungary

<sup>4</sup>MTA-SE Lendület Neurobiochemistry Research Group, Budapest, 1094, Hungary

<sup>5</sup>Biology Department, Boston College, Chestnut Hill, Boston, MA, 02467, USA

<sup>6</sup>MTA-SE Laboratory for Neurobiochemistry, Budapest, 1094, Hungary

\*Address correspondence to: Dr. Christos Chinopoulos, Department of Medical Biochemistry, Semmelweis University, Budapest, Tuzolto street 37-47, 1094, Hungary.

Tel: +361 4591500 ext. 60024, Fax: +361 2670031. E-mail: [chinopoulos.christos@eok.sote.hu](mailto:chinopoulos.christos@eok.sote.hu)

Supplementary Table 1: Concentrations (in pmol/mg protein) of ceramides (Cer), glycolipids, lysophosphatidylcholines (LPC), phosphatidylcholines (PC), lysophosphatidylethanolamines (LPE), and phosphatidylethanolamines (PE) in Aac2 and ArANT expressing yeast cells, Percoll-purified mitochondria and mitoplasts. N.D.: not determined. B.Q.L.: below quantitative limit. O-(carbon:double bond) indicates a plasmalogen species. Results shown are Mean +/- S.E.M.

| [M+H] <sup>+</sup> | Species            | Control    |   |        |              |   |        |            |   |        | Artemia-ANT |   |              |       |            |        |       |   |        |
|--------------------|--------------------|------------|---|--------|--------------|---|--------|------------|---|--------|-------------|---|--------------|-------|------------|--------|-------|---|--------|
|                    |                    | Yeast Cell |   |        | Mitochondria |   |        | Mitoplasts |   |        | Yeast Cell  |   | Mitochondria |       | Mitoplasts |        |       |   |        |
| 680.5              | Cer_d18:0/26:0     | B.Q.L.     | ± | B.Q.L. | N.D.         | ± | N.D.   | B.Q.L.     | ± | B.Q.L. | B.Q.L.      | ± | B.Q.L.       | 4.973 | ±          | 0.6591 | 1.237 | ± | 0.7837 |
| 648.5              | Cer_d18:1/24:1     | 1.617      | ± | 0.7236 | 1.034        | ± | 0.654  | 1.941      | ± | 0.8818 | 1.056       | ± | 0.6678       | 2.822 | ±          | 0.9624 | 1.255 | ± | 0.7954 |
| 698.5              | d18:1/16:1-MonoHex | B.Q.L.     | ± | B.Q.L. | 4.630        | ± | 2.493  | 2.940      | ± | 1.471  | B.Q.L.      | ± | B.Q.L.       | 38.59 | ±          | 5.947  | 24.75 | ± | 2.318  |
| 700.6              | d18:1/16:0-MonoHex | B.Q.L.     | ± | B.Q.L. | B.Q.L.       | ± | B.Q.L. | B.Q.L.     | ± | B.Q.L. | B.Q.L.      | ± | B.Q.L.       | 6.386 | ±          | 0.9317 | 1.264 | ± | 0.8042 |
| 726.6              | d18:1/18:1-MonoHex | B.Q.L.     | ± | B.Q.L. | 0.8924       | ± | 0.8924 | B.Q.L.     | ± | B.Q.L. | B.Q.L.      | ± | B.Q.L.       | 14.70 | ±          | 1.474  | 9.94  | ± | 1.188  |
| 728.6              | d18:1/18:0-MonoHex | 2.996      | ± | 2.996  | 22.97        | ± | 9.343  | 20.52      | ± | 3.265  | B.Q.L.      | ± | B.Q.L.       | 233.9 | ±          | 25.04  | 141.2 | ± | 10.56  |
| 412.3              | LPC_10:0_          | 5.692      | ± | 0.5157 | 3.422        | ± | 0.8125 | 7.794      | ± | 1.134  | 7.409       | ± | 1.666        | 5.535 | ±          | 0.2296 | 6.613 | ± | 0.2719 |
| 440.3              | LPC_12:0_          | 20.13      | ± | 2.037  | 16.06        | ± | 3.866  | 44.61      | ± | 4.108  | 12.99       | ± | 0.8787       | 75.50 | ±          | 5.643  | 44.17 | ± | 2.520  |
| 468.3              | LPC_14:0_          | 12.90      | ± | 1.310  | 71.30        | ± | 18.81  | 78.39      | ± | 7.839  | 8.075       | ± | 1.374        | 153.2 | ±          | 9.927  | 112.7 | ± | 7.225  |
| 466.3              | LPC_14:1_          | 25.89      | ± | 3.420  | 48.54        | ± | 7.530  | 90.75      | ± | 11.75  | 26.71       | ± | 2.204        | 129.1 | ±          | 11.67  | 77.03 | ± | 3.357  |
| 496.3              | LPC_16:0_          | 132.2      | ± | 19.12  | 612.1        | ± | 146.5  | 529.0      | ± | 53.53  | 111.4       | ± | 10.30        | 1484  | ±          | 101.3  | 1002  | ± | 45.86  |
| 494.3              | LPC_16:1_          | 554.4      | ± | 71.33  | 6401         | ± | 1616   | 7029       | ± | 738.9  | 585.4       | ± | 80.38        | 17330 | ±          | 1239   | 9924  | ± | 433.9  |
| 524.4              | LPC_18:0_          | 158.4      | ± | 19.59  | 374.0        | ± | 101.8  | 346.7      | ± | 48.75  | 173.4       | ± | 11.55        | 1172  | ±          | 63.75  | 752.6 | ± | 24.84  |
| 522.4              | LPC_18:1_          | 1191       | ± | 178.4  | 5730         | ± | 1558   | 6194       | ± | 1148   | 1740        | ± | 253.5        | 21050 | ±          | 1492   | 12490 | ± | 453.7  |
| 520.4              | LPC_18:2_          | 5.423      | ± | 0.4894 | 46.58        | ± | 8.057  | 46.78      | ± | 3.313  | 9.765       | ± | 1.032        | 234.6 | ±          | 16.72  | 49.36 | ± | 4.037  |
| 552.4              | LPC_20:0_          | 7.015      | ± | 0.8555 | 44.30        | ± | 12.67  | 58.79      | ± | 6.040  | 6.821       | ± | 1.030        | 123.3 | ±          | 13.10  | 63.74 | ± | 5.395  |
| 550.4              | LPC_20:1_          | 15.46      | ± | 1.849  | 22.84        | ± | 7.552  | 21.49      | ± | 3.872  | 19.95       | ± | 2.757        | 69.25 | ±          | 4.300  | 56.51 | ± | 4.128  |
| 580.4              | LPC_22:0_          | 10.07      | ± | 1.318  | 37.03        | ± | 10.96  | 44.63      | ± | 6.450  | 12.67       | ± | 2.031        | 146.0 | ±          | 13.12  | 74.24 | ± | 3.126  |
| 608.5              | LPC_24:0_          | 10.66      | ± | 3.959  | 34.70        | ± | 9.034  | 31.17      | ± | 9.574  | 10.35       | ± | 1.946        | 76.15 | ±          | 8.753  | 60.64 | ± | 2.661  |
| 606.5              | LPC_24:1_          | 11.57      | ± | 2.669  | 6.565        | ± | 1.027  | 8.128      | ± | 0.7708 | 10.84       | ± | 1.432        | 7.674 | ±          | 0.772  | 6.876 | ± | 0.9144 |
| 636.5              | LPC_26:0_          | 28.32      | ± | 6.765  | 31.01        | ± | 4.990  | 26.23      | ± | 1.917  | 21.59       | ± | 1.736        | 53.38 | ±          | 4.499  | 40.16 | ± | 2.130  |
| 634.5              | LPC_26:1_          | 12.18      | ± | 2.283  | 17.22        | ± | 2.028  | 15.84      | ± | 0.9973 | 12.31       | ± | 1.959        | 24.89 | ±          | 1.632  | 17.8  | ± | 1.207  |
| 482.3              | LPC_O-16:0_        | 2.238      | ± | 1.049  | 7.132        | ± | 1.930  | 6.475      | ± | 1.144  | 1.408       | ± | 0.8909       | 13.40 | ±          | 1.431  | 10.00 | ± | 1.003  |
| 480.3              | LPC_O-16:1_        | 2.653      | ± | 0.5424 | 20.29        | ± | 5.257  | 27.14      | ± | 3.187  | 2.770       | ± | 0.9158       | 54.42 | ±          | 4.737  | 29.42 | ± | 2.634  |
| 508.4              | LPC_O-18:1_        | 6.135      | ± | 0.9835 | 27.46        | ± | 5.691  | 28.72      | ± | 2.186  | 6.359       | ± | 0.8757       | 65.48 | ±          | 2.894  | 38.81 | ± | 3.318  |
| 538.4              | LPC_O-20:0_        | 7.927      | ± | 0.6309 | 8.194        | ± | 2.005  | 15.89      | ± | 3.418  | 10.69       | ± | 1.43         | 24.26 | ±          | 2.795  | 12.83 | ± | 0.6715 |
| 536.4              | LPC_O-20:1_        | 1.790      | ± | 0.8754 | 4.245        | ± | 1.161  | 5.143      | ± | 0.7835 | 3.432       | ± | 1.368        | 9.655 | ±          | 0.8034 | 5.064 | ± | 1.130  |
| 566.4              | LPC_O-22:0_        | 9.112      | ± | 1.752  | 7.415        | ± | 0.6122 | 10.35      | ± | 2.207  | 7.193       | ± | 0.9901       | 9.856 | ±          | 0.8282 | 14.55 | ± | 1.784  |
| 622.5              | PC_24:0_           | 18.00      | ± | 2.426  | 24.95        | ± | 5.051  | 19.48      | ± | 2.441  | 15.03       | ± | 1.645        | 38.66 | ±          | 3.723  | 32.25 | ± | 1.705  |
| 620.5              | PC_24:1_           | 182.4      | ± | 12.57  | 28.57        | ± | 3.876  | 44.27      | ± | 3.010  | 168.7       | ± | 26.88        | 22.08 | ±          | 2.003  | 26.96 | ± | 1.643  |
| 650.5              | PC_26:0_           | 74.83      | ± | 15.23  | 210.3        | ± | 28.30  | 144.5      | ± | 14.02  | 48.52       | ± | 3.888        | 177.2 | ±          | 11.61  | 159.3 | ± | 7.344  |

|       |                     |       |   |        |       |   |       |       |   |        |        |   |        |       |   |        |       |   |        |
|-------|---------------------|-------|---|--------|-------|---|-------|-------|---|--------|--------|---|--------|-------|---|--------|-------|---|--------|
| 648.5 | PC_26:1_            | 1025  | ± | 49.68  | 1116  | ± | 47.42 | 1105  | ± | 61.79  | 858.3  | ± | 38.78  | 1012  | ± | 30.49  | 960.1 | ± | 16.76  |
| 678.5 | PC_28:0_            | 107.7 | ± | 25.06  | 576.4 | ± | 81.22 | 418.6 | ± | 40.63  | 64.45  | ± | 2.834  | 555.3 | ± | 34.58  | 439.7 | ± | 17.62  |
| 676.5 | PC_28:1_            | 1801  | ± | 91.25  | 3938  | ± | 372.2 | 3170  | ± | 173.3  | 1536   | ± | 39.34  | 3378  | ± | 142.3  | 2958  | ± | 56.51  |
| 706.6 | PC_30:0_            | 59.21 | ± | 16.88  | 405.0 | ± | 55.54 | 292.4 | ± | 29.91  | 29.28  | ± | 3.563  | 402.8 | ± | 20.79  | 326.2 | ± | 11.71  |
| 704.6 | PC_30:1_            | 234.0 | ± | 88.37  | 3066  | ± | 472.7 | 2034  | ± | 184.1  | 85.84  | ± | 5.805  | 2577  | ± | 162.7  | 1999  | ± | 43.17  |
| 702.6 | PC_30:2_            | 86.17 | ± | 25.82  | 1336  | ± | 258.0 | 788.1 | ± | 42.68  | 38.76  | ± | 3.598  | 961.1 | ± | 50.96  | 759.2 | ± | 12.03  |
| 700.6 | PC_30:3_            | 3.121 | ± | 1.169  | 23.04 | ± | 2.975 | 17.50 | ± | 1.414  | 0.9782 | ± | 0.6187 | 21.35 | ± | 1.822  | 18.80 | ± | 1.291  |
| 734.6 | PC_32:0_            | 87.33 | ± | 37.55  | 925.8 | ± | 148.0 | 640.8 | ± | 69.96  | 35.14  | ± | 2.436  | 1023  | ± | 60.65  | 773.7 | ± | 27.15  |
| 732.6 | PC_32:1_            | 1140  | ± | 454.8  | 9827  | ± | 1297  | 7167  | ± | 382.3  | 429.1  | ± | 29.83  | 10590 | ± | 274.0  | 8713  | ± | 170.5  |
| 730.6 | PC_32:2_            | 2312  | ± | 922.4  | 21450 | ± | 2427  | 15730 | ± | 321.3  | 848.6  | ± | 51.19  | 21100 | ± | 575.3  | 18150 | ± | 476.7  |
| 728.6 | PC_32:3_            | 13.02 | ± | 5.544  | 180.6 | ± | 34.76 | 111.5 | ± | 8.632  | 7.420  | ± | 0.5756 | 178.1 | ± | 6.801  | 145.2 | ± | 6.336  |
| 762.6 | PC_34:0_            | 58.41 | ± | 30.72  | 871.9 | ± | 185.5 | 568.0 | ± | 68.34  | 20.17  | ± | 1.551  | 1330  | ± | 49.91  | 1021  | ± | 23.05  |
| 760.6 | PC_34:1_            | 732.1 | ± | 400.1  | 9098  | ± | 1585  | 6582  | ± | 630.5  | 242.0  | ± | 19.40  | 12280 | ± | 310.5  | 10350 | ± | 255.4  |
| 758.6 | PC_34:2_            | 2160  | ± | 950.7  | 21750 | ± | 3104  | 15970 | ± | 1019   | 994.2  | ± | 79.74  | 26480 | ± | 1039   | 22630 | ± | 677.1  |
| 756.6 | PC_34:3_            | 30.96 | ± | 11.83  | 723.8 | ± | 99.53 | 471.8 | ± | 40.84  | 9.200  | ± | 0.7072 | 701.7 | ± | 41.35  | 511.0 | ± | 21.38  |
| 790.6 | PC_36:0_/PC_O-38:7_ | 66.04 | ± | 32.51  | 1184  | ± | 273.0 | 724.5 | ± | 78.85  | 26.51  | ± | 1.895  | 1713  | ± | 101.0  | 1284  | ± | 19.39  |
| 788.6 | PC_36:1_            | 229.1 | ± | 128.6  | 3757  | ± | 894.3 | 2473  | ± | 328.0  | 88.30  | ± | 7.673  | 6363  | ± | 250.1  | 5089  | ± | 91.89  |
| 786.6 | PC_36:2_            | 363.0 | ± | 208.4  | 7887  | ± | 1739  | 5225  | ± | 700.1  | 191.4  | ± | 24.77  | 12570 | ± | 457.6  | 10480 | ± | 284.8  |
| 784.6 | PC_36:3_            | 13.04 | ± | 4.153  | 307.4 | ± | 49.81 | 198.6 | ± | 15.37  | 10.10  | ± | 3.238  | 426.2 | ± | 31.01  | 272.9 | ± | 17.02  |
| 818.7 | PC_38:0_/PC_O-40:7_ | 30.93 | ± | 16.56  | 719.9 | ± | 207.9 | 406.1 | ± | 63.08  | 12.25  | ± | 0.9141 | 1238  | ± | 68.09  | 912.3 | ± | 21.49  |
| 816.7 | PC_38:1_            | 31.75 | ± | 17.62  | 600.7 | ± | 155.7 | 414.6 | ± | 63.58  | 11.16  | ± | 1.722  | 1025  | ± | 124.4  | 642.0 | ± | 20.49  |
| 814.7 | PC_38:2_            | 12.70 | ± | 4.775  | 186.2 | ± | 54.68 | 110.4 | ± | 13.51  | 8.704  | ± | 1.427  | 427.8 | ± | 22.23  | 327.2 | ± | 4.862  |
| 812.7 | PC_38:3_            | 1.828 | ± | 0.5803 | 25.18 | ± | 7.371 | 16.47 | ± | 1.872  | 3.379  | ± | 2.612  | 26.73 | ± | 1.514  | 25.68 | ± | 6.485  |
| 804.7 | PC_38:7_/PC_O-38:0_ | 8.385 | ± | 2.191  | 68.10 | ± | 17.49 | 41.89 | ± | 4.876  | 5.183  | ± | 0.8508 | 110.1 | ± | 4.183  | 88.95 | ± | 3.079  |
| 802.7 | PC_38:8_/PC_O-38:1_ | 6.127 | ± | 1.308  | 35.02 | ± | 7.180 | 28.57 | ± | 3.597  | 4.617  | ± | 0.5366 | 62.29 | ± | 2.935  | 47.75 | ± | 1.806  |
| 846.7 | PC_40:0_/PC_O-42:7_ | 6.896 | ± | 3.976  | 144.8 | ± | 46.79 | 79.55 | ± | 13.99  | 3.496  | ± | 0.2167 | 317.7 | ± | 13.37  | 225.8 | ± | 8.343  |
| 884.7 | PC_44:9_/PC_O-44:2_ | 5.582 | ± | 0.5106 | 8.132 | ± | 1.256 | 11.12 | ± | 0.3921 | 3.969  | ± | 0.8839 | 14.93 | ± | 0.9244 | 15.26 | ± | 0.3037 |
| 664.5 | PC_O-28:0_          | 7.518 | ± | 1.585  | 17.87 | ± | 1.539 | 16.70 | ± | 1.438  | 7.972  | ± | 0.9606 | 19.74 | ± | 1.069  | 16.81 | ± | 1.100  |
| 662.5 | PC_O-28:1_          | 23.98 | ± | 0.901  | 30.39 | ± | 1.659 | 28.94 | ± | 1.987  | 21.04  | ± | 0.7912 | 29.96 | ± | 2.426  | 26.35 | ± | 0.8645 |
| 660.5 | PC_O-28:2_          | 137.3 | ± | 5.370  | 117.3 | ± | 3.043 | 128.7 | ± | 9.205  | 122.8  | ± | 3.659  | 118.2 | ± | 6.551  | 115.8 | ± | 4.706  |
| 692.5 | PC_O-30:0_          | 21.32 | ± | 4.084  | 30.14 | ± | 1.279 | 37.36 | ± | 5.624  | 16.76  | ± | 1.846  | 31.61 | ± | 3.485  | 25.08 | ± | 2.243  |
| 690.5 | PC_O-30:1_          | 58.96 | ± | 10.22  | 59.81 | ± | 3.559 | 100.2 | ± | 24.34  | 65.90  | ± | 26.09  | 60.82 | ± | 9.116  | 48.96 | ± | 2.396  |
| 688.5 | PC_O-30:2_          | 8.027 | ± | 1.337  | 21.63 | ± | 1.846 | 16.85 | ± | 1.230  | 8.266  | ± | 1.138  | 15.65 | ± | 0.7216 | 13.60 | ± | 1.157  |
| 720.6 | PC_O-32:0_          | 16.82 | ± | 3.332  | 107.2 | ± | 14.44 | 77.49 | ± | 7.725  | 12.65  | ± | 1.864  | 96.37 | ± | 5.962  | 92.03 | ± | 3.951  |
| 718.6 | PC_O-32:1_          | 84.65 | ± | 10.34  | 333.6 | ± | 28.25 | 253.1 | ± | 23.64  | 60.11  | ± | 2.245  | 262.3 | ± | 12.05  | 221.0 | ± | 8.740  |
| 716.6 | PC_O-32:2_          | 27.60 | ± | 9.088  | 446.0 | ± | 60.11 | 281.5 | ± | 21.65  | 9.555  | ± | 0.9663 | 304.0 | ± | 17.95  | 251.8 | ± | 2.698  |

|       |            |        |   |        |       |   |       |       |   |        |        |   |        |       |   |        |       |   |        |
|-------|------------|--------|---|--------|-------|---|-------|-------|---|--------|--------|---|--------|-------|---|--------|-------|---|--------|
| 748.6 | PC_O-34:0_ | 20.91  | ± | 7.709  | 287.4 | ± | 67.47 | 149.8 | ± | 20.72  | 11.90  | ± | 1.278  | 302.1 | ± | 21.96  | 245.1 | ± | 9.511  |
| 746.6 | PC_O-34:1_ | 24.82  | ± | 8.322  | 310.7 | ± | 55.38 | 219.7 | ± | 24.07  | 12.51  | ± | 1.384  | 333.7 | ± | 14.36  | 260.3 | ± | 6.275  |
| 744.6 | PC_O-34:2_ | 25.25  | ± | 12.45  | 538.0 | ± | 86.46 | 334.9 | ± | 24.60  | 9.960  | ± | 0.8987 | 577.5 | ± | 28.06  | 431.6 | ± | 9.686  |
| 776.6 | PC_O-36:0_ | 23.33  | ± | 8.930  | 178.0 | ± | 49.74 | 98.28 | ± | 12.58  | 13.88  | ± | 0.7755 | 259.8 | ± | 10.26  | 219.2 | ± | 5.974  |
| 774.6 | PC_O-36:1_ | 21.13  | ± | 5.894  | 160.0 | ± | 32.12 | 133.4 | ± | 19.62  | 11.95  | ± | 1.305  | 264.6 | ± | 21.50  | 195.7 | ± | 4.378  |
| 772.6 | PC_O-36:2_ | 8.850  | ± | 3.497  | 184.4 | ± | 34.89 | 113.1 | ± | 11.16  | 5.309  | ± | 0.6325 | 272.0 | ± | 13.92  | 208.4 | ± | 4.244  |
| 800.7 | PC_O-38:2_ | 4.218  | ± | 0.4481 | 23.09 | ± | 4.098 | 14.29 | ± | 0.8367 | 3.764  | ± | 0.3134 | 29.76 | ± | 0.5652 | 23.38 | ± | 0.9401 |
| 454.3 | LPE_16:0_  | 366.4  | ± | 41.49  | 362.7 | ± | 91.40 | 775.6 | ± | 138.4  | 169.9  | ± | 28.02  | 618.4 | ± | 24.72  | 1220  | ± | 69.38  |
| 452.3 | LPE_16:1_  | 1046   | ± | 148.7  | 2947  | ± | 828.9 | 6459  | ± | 1418   | 983.4  | ± | 200.0  | 7922  | ± | 508.1  | 12640 | ± | 646.6  |
| 482.3 | LPE_18:0_  | 78.90  | ± | 14.06  | 200.3 | ± | 62.66 | 245.2 | ± | 63.24  | 89.03  | ± | 16.15  | 684.8 | ± | 50.48  | 419.1 | ± | 32.18  |
| 480.3 | LPE_18:1_  | 2997   | ± | 365.4  | 8738  | ± | 2666  | 10050 | ± | 2800   | 3276   | ± | 581.9  | 29670 | ± | 1665   | 18560 | ± | 552.7  |
| 478.3 | LPE_18:2_  | B.Q.L. | ± | B.Q.L. | 52.74 | ± | 13.24 | 44.03 | ± | 7.682  | 10.05  | ± | 4.628  | 69.20 | ± | 7.117  | 37.98 | ± | 4.063  |
| 608.5 | PE_26:0_   | 3.462  | ± | 1.680  | 34.59 | ± | 5.043 | 23.69 | ± | 1.446  | 1.064  | ± | 0.6743 | 22.35 | ± | 1.285  | 20.37 | ± | 1.317  |
| 606.5 | PE_26:1_   | 7.439  | ± | 2.321  | 37.54 | ± | 5.972 | 25.76 | ± | 1.159  | 6.340  | ± | 1.027  | 26.69 | ± | 1.358  | 20.40 | ± | 2.043  |
| 636.5 | PE_28:0_   | 4.824  | ± | 1.886  | 103.6 | ± | 11.00 | 67.03 | ± | 3.225  | 0.7979 | ± | 0.7979 | 55.04 | ± | 2.949  | 45.40 | ± | 1.252  |
| 634.5 | PE_28:1_   | 26.70  | ± | 9.749  | 273.3 | ± | 31.58 | 189.1 | ± | 7.074  | 8.935  | ± | 0.5977 | 221.1 | ± | 8.888  | 152.5 | ± | 2.325  |
| 664.5 | PE_30:0_   | 3.571  | ± | 1.340  | 49.52 | ± | 5.125 | 34.85 | ± | 1.777  | 1.346  | ± | 0.8546 | 33.77 | ± | 1.763  | 29.68 | ± | 1.984  |
| 662.5 | PE_30:1_   | 56.60  | ± | 10.31  | 472.5 | ± | 55.28 | 355.1 | ± | 16.53  | 39.96  | ± | 1.294  | 376.7 | ± | 11.21  | 294.6 | ± | 6.930  |
| 660.5 | PE_30:2_   | 3.461  | ± | 1.937  | 64.00 | ± | 11.24 | 42.25 | ± | 1.628  | 2.040  | ± | 0.9412 | 57.13 | ± | 2.991  | 40.49 | ± | 2.418  |
| 692.5 | PE_32:0_   | 22.81  | ± | 4.522  | 306.3 | ± | 34.63 | 224.3 | ± | 12.34  | 18.16  | ± | 1.730  | 254.8 | ± | 12.06  | 193.1 | ± | 7.762  |
| 690.5 | PE_32:1_   | 1522   | ± | 135.9  | 6064  | ± | 557.0 | 4812  | ± | 221.7  | 1376   | ± | 28.61  | 5186  | ± | 156.4  | 4262  | ± | 120.2  |
| 686.5 | PE_32:3_   | 5.419  | ± | 1.726  | 14.54 | ± | 1.848 | 12.38 | ± | 1.183  | 4.535  | ± | 0.9771 | 15.96 | ± | 0.9864 | 12.60 | ± | 0.8093 |
| 720.6 | PE_34:0_   | 27.22  | ± | 9.038  | 440.2 | ± | 70.05 | 340.9 | ± | 22.26  | 13.20  | ± | 2.589  | 521.5 | ± | 16.05  | 393.7 | ± | 19.05  |
| 718.6 | PE_34:1_   | 495.4  | ± | 166.3  | 8399  | ± | 1300  | 6508  | ± | 405.5  | 227.7  | ± | 47.65  | 10290 | ± | 202.5  | 7972  | ± | 263.2  |
| 716.6 | PE_34:2_   | 2233   | ± | 838.6  | 33560 | ± | 4406  | 25050 | ± | 1686   | 1148   | ± | 218.1  | 40820 | ± | 537.8  | 34140 | ± | 606.3  |
| 714.6 | PE_34:3_   | 9.530  | ± | 2.961  | 183.1 | ± | 11.37 | 137.1 | ± | 18.21  | 3.282  | ± | 1.144  | 136.7 | ± | 11.09  | 100.8 | ± | 7.134  |
| 712.6 | PE_34:4_   | 49.14  | ± | 9.735  | 115.4 | ± | 8.652 | 115.4 | ± | 16.49  | 35.06  | ± | 5.439  | 95.58 | ± | 10.31  | 81.79 | ± | 6.185  |
| 748.6 | PE_36:0    | 0.6437 | ± | 0.6437 | 14.68 | ± | 3.254 | 12.70 | ± | 1.233  | B.Q.L. | ± | B.Q.L. | 32.75 | ± | 1.661  | 26.66 | ± | 1.454  |
| 746.6 | PE_36:1_   | 30.40  | ± | 8.108  | 636.7 | ± | 122.8 | 470.4 | ± | 47.74  | 19.35  | ± | 3.415  | 1189  | ± | 19.60  | 918.1 | ± | 21.84  |
| 744.6 | PE_36:2_   | 268.8  | ± | 76.80  | 7455  | ± | 1421  | 5026  | ± | 528.7  | 174.1  | ± | 40.55  | 12640 | ± | 337.0  | 9731  | ± | 85.09  |
| 742.6 | PE_36:3_   | 5.119  | ± | 1.859  | 176.4 | ± | 9.444 | 125.9 | ± | 17.76  | 3.041  | ± | 0.9974 | 127.9 | ± | 7.411  | 95.73 | ± | 5.902  |
| 740.6 | PE_36:4_   | 16.59  | ± | 7.172  | 191.9 | ± | 25.96 | 173.8 | ± | 22.42  | 6.701  | ± | 1.404  | 229.1 | ± | 21.52  | 152.5 | ± | 11.29  |
| 772.6 | PE_38:2_   | B.Q.L. | ± | B.Q.L. | 12.18 | ± | 2.519 | 8.735 | ± | 1.314  | B.Q.L. | ± | B.Q.L. | 21.72 | ± | 2.373  | 19.52 | ± | 1.211  |
| 768.6 | PE_38:4_   | B.Q.L. | ± | B.Q.L. | 15.54 | ± | 3.538 | 16.96 | ± | 2.790  | 3.034  | ± | 2.330  | 26.02 | ± | 1.817  | 21.51 | ± | 1.773  |
| 722.6 | PE_O-36:6_ | 11.23  | ± | 4.297  | 423.0 | ± | 53.48 | 168.7 | ± | 66.82  | 9.839  | ± | 2.527  | 415.1 | ± | 49.27  | 425.3 | ± | 16.29  |

Supplementary Table 2: Concentrations (in pmol/mg protein) of cholesteryl esters (CE), diacylglycerols (DAG), and triacylglycerols (TAG) in Aac2 and ArANT expressing yeast cells, Percoll-purified mitochondria and mitoplasts. For TAG determination, all the fragments that would comprise the acyl chains were summed up and isomeric composition for the molecular species as the brutto nomenclature (carbon:double bond) is given. CE concentrations are compared to the internal standard TAG<sub>17:1-17:1-17:1</sub>. N.D.: not determined. B.Q.L.: below quantitative limit. Results shown are Mean +/- S.E.M.

| [M+NH4] <sup>+</sup> | Species  | Aac2       |         |              |          |            |          |       | Artemia-ANT |       |              |       |            |  |  |
|----------------------|----------|------------|---------|--------------|----------|------------|----------|-------|-------------|-------|--------------|-------|------------|--|--|
|                      |          | Yeast Cell |         | Mitochondria |          | Mitoplasts |          |       | Yeast Cell  |       | Mitochondria |       | Mitoplasts |  |  |
| 666.5                | CE_18:2  | 12.53      | ± 3.105 | 19.08        | ± 8.751  | 23.73      | ± 9.218  | 18.73 | ± 7.045     | 7.161 | ± 3.305      | 15.48 | ± 9.161    |  |  |
| 668.5                | CE_18:1  | 3.609      | ± 1.616 | 7.378        | ± 2.406  | 4.626      | ± 2.166  | 5.496 | ± 1.913     | 4.437 | ± 1.544      | 5.567 | ± 2.867    |  |  |
| 528.4                | DAG_28:1 | 2.556      | ± 1.617 | 32.67        | ± 6.126  | 14.63      | ± 0.7781 | 3.752 | ± 2.562     | 27.14 | ± 2.883      | 14.91 | ± 1.447    |  |  |
| 530.4                | DAG_28:0 | 88.57      | ± 7.099 | 59.69        | ± 5.554  | 67.29      | ± 5.256  | 87.12 | ± 5.540     | 53.00 | ± 3.031      | 59.27 | ± 6.821    |  |  |
| 554.4                | DAG_30:2 | 10.33      | ± 4.945 | 206.8        | ± 45.00  | 86.33      | ± 5.924  | 15.74 | ± 2.879     | 239.8 | ± 15.84      | 92.68 | ± 3.098    |  |  |
| 556.4                | DAG_30:1 | 54.85      | ± 15.55 | 1193         | ± 216.3  | 587.2      | ± 54.25  | 57.35 | ± 14.19     | 1365  | ± 62.20      | 751.6 | ± 28.21    |  |  |
| 558.4                | DAG_30:0 | 283.7      | ± 11.97 | 351.3        | ± 17.17  | 342.2      | ± 12.38  | 267.3 | ± 5.037     | 415.5 | ± 12.11      | 367.4 | ± 16.41    |  |  |
| 582.4                | DAG_32:2 | 280.1      | ± 129.1 | 7650         | ± 1724   | 3108       | ± 153.1  | 143.5 | ± 18.28     | 10820 | ± 762.8      | 4487  | ± 176.8    |  |  |
| 584.4                | DAG_32:1 | 333.0      | ± 152.8 | 11610        | ± 2438   | 6005       | ± 791.0  | 215.5 | ± 35.76     | 16180 | ± 738.5      | 10260 | ± 400.0    |  |  |
| 586.4                | DAG_32:0 | 1498       | ± 52.06 | 1683         | ± 50.18  | 1608       | ± 46.92  | 1465  | ± 44.71     | 1786  | ± 61.98      | 1771  | ± 68.42    |  |  |
| 608.5                | DAG_34:3 | 23.07      | ± 3.591 | 188.3        | ± 33.83  | 103.8      | ± 3.054  | 26.12 | ± 2.190     | 209.3 | ± 14.05      | 130.0 | ± 1.904    |  |  |
| 610.5                | DAG_34:2 | 633.4      | ± 328.7 | 16210        | ± 4031   | 7144       | ± 667.7  | 356.3 | ± 37.92     | 30830 | ± 1825       | 14910 | ± 240.1    |  |  |
| 612.5                | DAG_34:1 | 589.6      | ± 313.6 | 23170        | ± 5770   | 12330      | ± 2095   | 315.6 | ± 23.89     | 41280 | ± 2346       | 28380 | ± 699.7    |  |  |
| 614.5                | DAG_34:0 | 4756       | ± 148.5 | 5361         | ± 163.0  | 5054       | ± 98.80  | 4478  | ± 141.6     | 5733  | ± 180.4      | 5508  | ± 127.5    |  |  |
| 636.5                | DAG_36:3 | 34.08      | ± 4.854 | 135.1        | ± 30.15  | 79.13      | ± 6.695  | 45.70 | ± 8.862     | 149.7 | ± 9.570      | 94.97 | ± 5.108    |  |  |
| 638.5                | DAG_36:2 | 190.5      | ± 81.02 | 3111         | ± 881.4  | 2246       | ± 318.7  | 143.2 | ± 13.22     | 8598  | ± 522.0      | 6862  | ± 189.9    |  |  |
| 640.5                | DAG_36:1 | 254.1      | ± 102.3 | 6368         | ± 1793   | 3755       | ± 666.4  | 183.7 | ± 12.07     | 14250 | ± 1056       | 10700 | ± 256.8    |  |  |
| 642.5                | DAG_36:0 | 4243       | ± 133.6 | 4362         | ± 122.9  | 4340       | ± 84.43  | 4089  | ± 98.08     | 4734  | ± 120.7      | 4554  | ± 114.2    |  |  |
| 684.5                | TAG_38:0 | 15.54      | ± 1.606 | 96.68        | ± 71.98  | 18.93      | ± 1.055  | 12.73 | ± 0.3978    | 18.86 | ± 1.795      | 18.72 | ± 1.104    |  |  |
| 710.6                | TAG_40:1 | 7.374      | ± 3.477 | 100.3        | ± 44.42  | 20.27      | ± 5.660  | 2.912 | ± 1.334     | 35.06 | ± 5.013      | 35.63 | ± 1.728    |  |  |
| 712.6                | TAG_40:0 | 478.5      | ± 68.18 | 340.2        | ± 54.64  | 441.4      | ± 80.47  | 296.6 | ± 49.06     | 255.9 | ± 17.15      | 262.8 | ± 9.239    |  |  |
| 736.6                | TAG_42:2 | 42.70      | ± 13.84 | 925.4        | ± 164.3  | 276.9      | ± 96.19  | 24.85 | ± 2.364     | 593.5 | ± 88.28      | 554.8 | ± 12.18    |  |  |
| 738.6                | TAG_42:1 | 51.16      | ± 24.67 | 306.5        | ± 88.05  | 94.78      | ± 21.01  | 21.05 | ± 1.230     | 192.6 | ± 22.12      | 178.0 | ± 7.259    |  |  |
| 740.6                | TAG_42:0 | 16.27      | ± 3.798 | 88.78        | ± 65.29  | 18.76      | ± 2.601  | 13.60 | ± 2.190     | 21.30 | ± 2.832      | 17.87 | ± 0.9514   |  |  |
| 762.6                | TAG_44:3 | 6.848      | ± 2.200 | 11.36        | ± 0.8695 | 4.878      | ± 2.253  | 9.264 | ± 0.675     | 8.202 | ± 0.7587     | 9.346 | ± 1.263    |  |  |
| 764.6                | TAG_44:2 | 93.52      | ± 16.08 | 60.75        | ± 18.24  | 49.37      | ± 9.637  | 40.42 | ± 4.310     | 30.55 | ± 2.598      | 41.87 | ± 3.707    |  |  |
| 766.6                | TAG_44:1 | 42.60      | ± 20.32 | 51.92        | ± 25.07  | 26.06      | ± 2.189  | 22.92 | ± 5.599     | 25.29 | ± 7.435      | 31.93 | ± 0.6687   |  |  |
| 768.6                | TAG_44:0 | 161.0      | ± 35.28 | 93.35        | ± 27.28  | 70.75      | ± 14.30  | 77.33 | ± 8.541     | 50.88 | ± 11.22      | 50.98 | ± 12.45    |  |  |
| 790.6                | TAG_46:3 | 9.429      | ± 2.268 | 23.38        | ± 7.712  | 7.117      | ± 0.3515 | 6.968 | ± 1.081     | 9.412 | ± 2.022      | 8.512 | ± 0.5838   |  |  |
| 792.6                | TAG_46:2 | 29.12      | ± 9.738 | 51.98        | ± 16.73  | 21.27      | ± 1.090  | 25.74 | ± 5.964     | 29.02 | ± 9.940      | 26.72 | ± 1.459    |  |  |
| 794.6                | TAG_46:1 | 41.86      | ± 16.62 | 71.36        | ± 35.98  | 35.24      | ± 3.953  | 46.00 | ± 14.76     | 47.20 | ± 20.73      | 49.67 | ± 2.060    |  |  |

|       |          |       |   |        |       |   |        |       |   |        |       |   |        |       |   |        |       |   |        |
|-------|----------|-------|---|--------|-------|---|--------|-------|---|--------|-------|---|--------|-------|---|--------|-------|---|--------|
| 796.6 | TAG_46:0 | 37.54 | ± | 3.193  | 56.13 | ± | 15.76  | 42.65 | ± | 3.818  | 56.16 | ± | 15.16  | 53.13 | ± | 19.18  | 32.87 | ± | 1.641  |
| 812.7 | TAG_48:6 | 1.818 | ± | 1.169  | 9.320 | ± | 1.040  | 5.938 | ± | 1.291  | 3.725 | ± | 1.804  | 8.228 | ± | 0.7363 | 7.894 | ± | 0.2991 |
| 818.7 | TAG_48:3 | 120.7 | ± | 62.22  | 228.9 | ± | 44.15  | 46.63 | ± | 3.832  | 45.57 | ± | 2.595  | 79.61 | ± | 10.04  | 86.21 | ± | 5.426  |
| 820.7 | TAG_48:2 | 122.5 | ± | 57.32  | 143.1 | ± | 28.52  | 71.85 | ± | 4.809  | 60.97 | ± | 11.74  | 96.18 | ± | 19.68  | 137.4 | ± | 3.639  |
| 822.7 | TAG_48:1 | 43.23 | ± | 11.49  | 79.26 | ± | 32.85  | 41.70 | ± | 4.206  | 55.33 | ± | 18.20  | 64.48 | ± | 24.76  | 49.23 | ± | 2.102  |
| 824.7 | TAG_48:0 | 110.3 | ± | 9.548  | 112.8 | ± | 10.97  | 117.7 | ± | 7.025  | 121.7 | ± | 16.10  | 116.0 | ± | 20.90  | 96.00 | ± | 4.657  |
| 842.7 | TAG_50:5 | 5.547 | ± | 0.3466 | 9.543 | ± | 1.148  | 5.545 | ± | 0.2850 | 4.000 | ± | 0.8384 | 6.673 | ± | 0.7226 | 6.686 | ± | 0.5762 |
| 844.7 | TAG_50:4 | 10.96 | ± | 1.559  | 25.22 | ± | 4.205  | 14.05 | ± | 0.7409 | 9.111 | ± | 0.9365 | 18.25 | ± | 2.049  | 15.78 | ± | 0.5396 |
| 846.7 | TAG_50:3 | 344.9 | ± | 191.8  | 518.5 | ± | 98.18  | 120.8 | ± | 4.919  | 129.8 | ± | 7.452  | 219.1 | ± | 17.89  | 359.9 | ± | 21.69  |
| 848.7 | TAG_50:2 | 318.5 | ± | 176.9  | 304.3 | ± | 67.53  | 193.9 | ± | 18.67  | 126.5 | ± | 14.20  | 227.0 | ± | 25.63  | 603.7 | ± | 18.47  |
| 850.7 | TAG_50:1 | 85.33 | ± | 24.16  | 141.4 | ± | 57.31  | 77.21 | ± | 9.359  | 75.97 | ± | 13.09  | 101.0 | ± | 21.58  | 118.0 | ± | 6.205  |
| 852.7 | TAG_50:0 | 210.4 | ± | 20.04  | 195.3 | ± | 6.600  | 216.0 | ± | 9.800  | 195.2 | ± | 14.58  | 192.4 | ± | 13.45  | 175.0 | ± | 14.21  |
| 870.7 | TAG_52:5 | 7.456 | ± | 0.4955 | 16.89 | ± | 5.230  | 6.733 | ± | 1.604  | 5.096 | ± | 1.111  | 9.816 | ± | 1.057  | 9.971 | ± | 0.6115 |
| 872.7 | TAG_52:4 | 19.87 | ± | 2.365  | 52.83 | ± | 21.47  | 22.00 | ± | 1.656  | 20.64 | ± | 2.308  | 26.21 | ± | 2.815  | 26.43 | ± | 2.663  |
| 874.7 | TAG_52:3 | 311.5 | ± | 163.4  | 399.3 | ± | 89.96  | 145.9 | ± | 14.27  | 159.2 | ± | 12.06  | 233.2 | ± | 19.21  | 573.9 | ± | 26.06  |
| 876.7 | TAG_52:2 | 309.3 | ± | 160.9  | 305.0 | ± | 104.0  | 234.4 | ± | 30.12  | 137.3 | ± | 12.05  | 235.7 | ± | 26.27  | 913.3 | ± | 16.53  |
| 878.7 | TAG_52:1 | 60.04 | ± | 20.69  | 96.88 | ± | 39.33  | 54.87 | ± | 5.372  | 44.16 | ± | 4.904  | 62.75 | ± | 8.030  | 114.9 | ± | 2.671  |
| 880.7 | TAG_52:0 | 233.9 | ± | 27.90  | 224.9 | ± | 11.52  | 234.4 | ± | 10.81  | 215.8 | ± | 22.35  | 211.4 | ± | 13.88  | 203.7 | ± | 19.64  |
| 896.7 | TAG_54:6 | 28.48 | ± | 3.693  | 73.18 | ± | 31.36  | 35.59 | ± | 3.089  | 27.54 | ± | 2.589  | 38.13 | ± | 4.911  | 41.00 | ± | 2.350  |
| 898.7 | TAG_54:5 | 25.98 | ± | 4.057  | 101.2 | ± | 65.86  | 27.98 | ± | 3.452  | 27.25 | ± | 3.734  | 27.75 | ± | 3.632  | 30.91 | ± | 3.756  |
| 900.8 | TAG_54:4 | 40.84 | ± | 6.007  | 160.4 | ± | 103.5  | 39.54 | ± | 5.335  | 41.60 | ± | 5.851  | 40.10 | ± | 5.204  | 44.69 | ± | 5.427  |
| 902.8 | TAG_54:3 | 103.4 | ± | 26.26  | 286.1 | ± | 164.1  | 79.83 | ± | 10.70  | 81.16 | ± | 9.947  | 98.24 | ± | 10.86  | 210.7 | ± | 15.44  |
| 904.8 | TAG_54:2 | 77.53 | ± | 31.68  | 122.5 | ± | 48.37  | 69.20 | ± | 8.736  | 46.68 | ± | 4.393  | 72.02 | ± | 4.937  | 246.5 | ± | 8.624  |
| 906.8 | TAG_54:1 | 22.13 | ± | 5.303  | 38.78 | ± | 12.40  | 19.91 | ± | 2.013  | 17.99 | ± | 1.915  | 23.97 | ± | 2.517  | 37.01 | ± | 1.305  |
| 908.8 | TAG_54:0 | 118.4 | ± | 14.67  | 112.5 | ± | 7.088  | 124.9 | ± | 7.992  | 107.2 | ± | 13.66  | 110.5 | ± | 8.322  | 106.0 | ± | 9.372  |
| 924.8 | TAG_56:6 | 24.33 | ± | 2.730  | 23.28 | ± | 1.321  | 26.69 | ± | 1.953  | 21.81 | ± | 2.447  | 26.33 | ± | 2.495  | 29.72 | ± | 2.671  |
| 928.8 | TAG_56:4 | 3.554 | ± | 1.134  | 14.79 | ± | 4.806  | 7.614 | ± | 0.6003 | 5.306 | ± | 1.235  | 9.891 | ± | 0.6146 | 10.57 | ± | 0.5166 |
| 930.8 | TAG_56:3 | 6.937 | ± | 0.6418 | 24.49 | ± | 9.215  | 10.29 | ± | 0.8970 | 7.279 | ± | 0.4653 | 15.82 | ± | 1.091  | 14.52 | ± | 0.6809 |
| 932.8 | TAG_56:2 | 11.73 | ± | 1.104  | 25.90 | ± | 8.085  | 13.74 | ± | 1.055  | 11.92 | ± | 1.005  | 19.97 | ± | 1.387  | 19.04 | ± | 0.4274 |
| 934.8 | TAG_56:1 | 10.93 | ± | 1.330  | 18.16 | ± | 5.855  | 10.59 | ± | 1.451  | 14.49 | ± | 0.9455 | 13.32 | ± | 2.194  | 10.80 | ± | 0.4633 |
| 936.8 | TAG_56:0 | 6.431 | ± | 0.6806 | 6.763 | ± | 0.8326 | 6.865 | ± | 0.1861 | 7.188 | ± | 1.479  | 7.212 | ± | 1.405  | 5.544 | ± | 0.3396 |
| 954.8 | TAG_58:5 | 5.767 | ± | 1.244  | 7.864 | ± | 0.4943 | 8.561 | ± | 0.8993 | 6.234 | ± | 0.2124 | 7.575 | ± | 0.6691 | 8.765 | ± | 0.4720 |
| 956.8 | TAG_58:4 | 18.37 | ± | 2.156  | 17.47 | ± | 1.141  | 22.04 | ± | 1.940  | 18.28 | ± | 1.766  | 18.09 | ± | 1.297  | 19.06 | ± | 0.7642 |
| 958.8 | TAG_58:3 | 268.8 | ± | 26.55  | 226.9 | ± | 26.81  | 319.1 | ± | 31.42  | 241.5 | ± | 30.19  | 261.5 | ± | 18.47  | 273.0 | ± | 18.29  |
| 960.8 | TAG_58:2 | 15.80 | ± | 1.684  | 22.51 | ± | 4.225  | 18.02 | ± | 1.578  | 16.49 | ± | 1.369  | 18.19 | ± | 1.559  | 19.09 | ± | 1.222  |
| 962.8 | TAG_58:1 | 8.197 | ± | 1.632  | 9.493 | ± | 2.559  | 6.664 | ± | 0.6994 | 8.475 | ± | 0.4237 | 7.411 | ± | 1.411  | 5.597 | ± | 0.5167 |

Supplementary Table 3: Concentrations (in pmol/mg protein) of lysophosphatidic acids (LPA), phosphatidic acids (PA), lysophosphatidylglycerols (LPG), phosphatidylglycerols (PG), lysophosphatidylinositols (LPI), phosphatidylinositols (PI), lysophosphatidylserines (LPS), and phosphatidylserine (PS) in Aac2 and ArANT expressing yeast cells, Percoll-purified mitochondria and mitoplasts. N.D.: not determined. B.Q.L.: below quantitative limit. p(carbondouble bond) indicates a plasmalogen species. . a(carbon:double bond) indicates an alkylenyl species. Results shown are Mean +/- S.E.M.

| [M-H] <sup>-</sup> | Species      | Aac2       |         |              |         |            |         | Artemia-ANT |         |              |         |            |         |
|--------------------|--------------|------------|---------|--------------|---------|------------|---------|-------------|---------|--------------|---------|------------|---------|
|                    |              | Yeast Cell |         | Mitochondria |         | Mitoplasts |         | Yeast Cell  |         | Mitochondria |         | Mitoplasts |         |
| 409.3              | LPA_16:0_    | 683.1      | ± 121.2 | 180.2        | ± 17.90 | 380.6      | ± 115.1 | 435.9       | ± 125.4 | 134.5        | ± 21.98 | 128.3      | ± 10.02 |
| 407.3              | LPA_16:1_    | 558.1      | ± 131.0 | 113.7        | ± 12.80 | 272.1      | ± 57.61 | 238.1       | ± 82.06 | 154.3        | ± 23.23 | 171.5      | ± 24.03 |
| 437.3              | LPA_18:0_    | 632.8      | ± 118.5 | 132.3        | ± 25.59 | 319.0      | ± 76.28 | 368.8       | ± 108.9 | 99.55        | ± 20.71 | 99.40      | ± 14.72 |
| 435.3              | LPA_18:1_    | 235.8      | ± 52.76 | 69.37        | ± 9.324 | 130.5      | ± 31.40 | 141.6       | ± 46.04 | 116.4        | ± 15.92 | 106.7      | ± 4.006 |
| 535.4              | PA_10:0/14:0 | 190.0      | ± 21.18 | 106.1        | ± 22.62 | 140.8      | ± 30.04 | 119.2       | ± 18.47 | 55.99        | ± 9.277 | 68.60      | ± 6.949 |
| 563.4              | PA_12:0/14:0 | 59.76      | ± 11.85 | 36.88        | ± 6.713 | 46.95      | ± 12.52 | 51.77       | ± 8.620 | 14.33        | ± 4.715 | 30.31      | ± 6.388 |
| 591.4              | PA_14:0/14:0 | 166.0      | ± 21.27 | 105.0        | ± 18.80 | 114.6      | ± 11.41 | 107.0       | ± 14.03 | 72.98        | ± 6.600 | 84.05      | ± 11.07 |
| 617.5              | PA_14:0/16:1 | 345.0      | ± 58.76 | 269.9        | ± 23.31 | 336.6      | ± 12.59 | 254.2       | ± 29.19 | 257.6        | ± 29.62 | 267.2      | ± 32.86 |
| 647.5              | PA_14:0/18:0 | 533.3      | ± 73.24 | 223.9        | ± 39.53 | 336.7      | ± 58.00 | 322.6       | ± 19.10 | 135.9        | ± 20.03 | 161.6      | ± 19.48 |
| 645.5              | PA_14:0/18:1 | 298.6      | ± 34.78 | 1013         | ± 114.2 | 701.9      | ± 35.88 | 233.4       | ± 26.59 | 570.1        | ± 40.41 | 629.1      | ± 64.26 |
| 643.5              | PA_14:0/18:2 | 69.01      | ± 11.60 | 56.82        | ± 11.21 | 59.46      | ± 10.48 | 60.52       | ± 8.275 | 33.43        | ± 4.817 | 32.07      | ± 4.685 |
| 641.5              | PA_14:0/18:3 | 54.13      | ± 12.43 | 59.41        | ± 18.39 | 47.52      | ± 6.563 | 65.55       | ± 15.35 | 53.67        | ± 11.44 | 39.77      | ± 5.303 |
| 675.5              | PA_14:0/20:0 | 79.35      | ± 10.03 | 112.3        | ± 19.53 | 73.98      | ± 10.28 | 57.05       | ± 6.290 | 35.17        | ± 4.607 | 29.25      | ± 2.419 |
| 673.5              | PA_14:0/20:1 | 70.05      | ± 9.039 | 178.7        | ± 25.25 | 137.7      | ± 21.60 | 64.69       | ± 12.49 | 97.58        | ± 8.796 | 101.2      | ± 7.812 |
| 671.5              | PA_14:0/20:2 | 49.32      | ± 7.497 | 54.23        | ± 7.928 | 41.48      | ± 6.464 | 35.21       | ± 6.258 | 33.81        | ± 4.376 | 48.20      | ± 3.425 |
| 669.5              | PA_14:0/20:3 | 34.02      | ± 8.216 | 15.34        | ± 5.489 | 32.85      | ± 9.952 | 16.17       | ± 4.274 | 8.123        | ± 3.850 | 15.51      | ± 6.161 |
| 667.5              | PA_14:0/20:4 | 94.97      | ± 23.14 | 38.28        | ± 7.409 | 62.91      | ± 15.47 | 62.62       | ± 7.825 | 34.65        | ± 12.43 | 46.89      | ± 3.916 |
| 703.6              | PA_14:0/22:0 | 108.9      | ± 19.32 | 148.5        | ± 22.27 | 103.3      | ± 12.73 | 87.2        | ± 8.853 | 62.92        | ± 6.656 | 64.35      | ± 4.967 |
| 701.6              | PA_14:0/22:1 | 56.65      | ± 10.85 | 67.70        | ± 7.271 | 66.01      | ± 3.730 | 36.49       | ± 7.485 | 54.17        | ± 3.829 | 51.31      | ± 7.625 |
| 647.5              | PA_16:0/16:0 | 543.5      | ± 46.35 | 733.8        | ± 97.36 | 740.6      | ± 64.51 | 424.0       | ± 34.43 | 554.8        | ± 75.83 | 526.3      | ± 57.09 |
| 645.5              | PA_16:0/16:1 | 852.7      | ± 84.99 | 1917         | ± 151.7 | 1479       | ± 68.88 | 620.6       | ± 36.87 | 1274         | ± 94.89 | 1236       | ± 126.9 |
| 675.5              | PA_16:0/18:0 | 529.6      | ± 50.25 | 491.1        | ± 68.55 | 557.0      | ± 94.04 | 450.5       | ± 36.97 | 332.0        | ± 32.41 | 345.7      | ± 50.63 |
| 673.5              | PA_16:0/18:1 | 549.4      | ± 61.81 | 1391         | ± 132.1 | 1115       | ± 72.43 | 422.9       | ± 39.10 | 1174         | ± 126.7 | 1043       | ± 94.80 |
| 671.5              | PA_16:0/18:2 | 293.7      | ± 28.65 | 222.3        | ± 25.20 | 318.1      | ± 57.65 | 243.0       | ± 26.48 | 186.0        | ± 14.89 | 177.2      | ± 12.69 |
| 669.5              | PA_16:0/18:3 | 483.8      | ± 112.9 | 424.1        | ± 138.6 | 328.9      | ± 39.67 | 628.8       | ± 196.1 | 324.6        | ± 43.05 | 304.6      | ± 40.60 |
| 703.6              | PA_16:0/20:0 | 525.7      | ± 51.96 | 898.1        | ± 127.6 | 511.3      | ± 57.77 | 451.3       | ± 41.27 | 302.4        | ± 26.50 | 277.7      | ± 24.78 |
| 701.6              | PA_16:0/20:1 | 772.4      | ± 41.23 | 2056         | ± 172.3 | 1368       | ± 102.7 | 620.1       | ± 38.04 | 1424         | ± 83.53 | 1322       | ± 102.4 |
| 699.5              | PA_16:0/20:2 | 496.4      | ± 26.64 | 565.2        | ± 54.23 | 488.6      | ± 45.60 | 431.9       | ± 37.78 | 457.7        | ± 48.08 | 439.6      | ± 37.23 |
| 697.5              | PA_16:0/20:3 | 273.2      | ± 24.54 | 146.7        | ± 13.81 | 220.8      | ± 18.12 | 187.8       | ± 16.00 | 154.1        | ± 21.05 | 169.6      | ± 21.11 |
| 695.5              | PA_16:0/20:4 | 318.3      | ± 37.45 | 175.1        | ± 20.04 | 308.7      | ± 68.51 | 211.2       | ± 31.03 | 164.2        | ± 26.53 | 160.5      | ± 15.42 |

|       |               |       |   |       |       |   |       |       |   |       |       |   |       |       |   |       |       |   |       |
|-------|---------------|-------|---|-------|-------|---|-------|-------|---|-------|-------|---|-------|-------|---|-------|-------|---|-------|
| 693.5 | PA_16:0/20:5  | 196.0 | ± | 19.84 | 158.0 | ± | 15.69 | 289.1 | ± | 85.28 | 204.1 | ± | 22.36 | 115.3 | ± | 16.00 | 125.2 | ± | 8.953 |
| 731.6 | PA_16:0/22:0  | 602.5 | ± | 56.34 | 1531  | ± | 135.8 | 726.3 | ± | 46.66 | 495.7 | ± | 45.33 | 585.5 | ± | 76.02 | 509.5 | ± | 67.46 |
| 729.6 | PA_16:0/22:1  | 172.3 | ± | 25.34 | 141.1 | ± | 20.10 | 158.0 | ± | 16.00 | 154.0 | ± | 14.61 | 141.5 | ± | 20.42 | 156.8 | ± | 9.040 |
| 727.6 | PA_16:0/22:2  | 237.2 | ± | 29.78 | 152.4 | ± | 20.25 | 214.7 | ± | 20.52 | 170.9 | ± | 22.07 | 195.8 | ± | 12.80 | 187.0 | ± | 24.13 |
| 725.6 | PA_16:0/22:3  | 429.2 | ± | 72.06 | 447.5 | ± | 37.20 | 473.7 | ± | 123.1 | 207.4 | ± | 16.11 | 225.1 | ± | 24.31 | 228.2 | ± | 33.68 |
| 723.6 | PA_16:0/22:4  | 274.2 | ± | 31.55 | 142.5 | ± | 19.88 | 241.3 | ± | 60.26 | 192.7 | ± | 13.89 | 111.0 | ± | 19.39 | 124.9 | ± | 18.63 |
| 721.6 | PA_16:0/22:5  | 216.1 | ± | 23.27 | 114.6 | ± | 9.612 | 193.1 | ± | 53.27 | 145.7 | ± | 9.882 | 114.3 | ± | 10.06 | 113.6 | ± | 9.804 |
| 719.6 | PA_16:0/22:6  | 543.7 | ± | 47.96 | 610.0 | ± | 46.28 | 644.9 | ± | 66.73 | 377.3 | ± | 35.96 | 507.6 | ± | 38.68 | 530.8 | ± | 52.47 |
| 703.6 | PA_18:0/18:0  | 594.2 | ± | 44.89 | 309.1 | ± | 35.88 | 491.5 | ± | 124.8 | 455.9 | ± | 42.06 | 213.1 | ± | 26.23 | 223.2 | ± | 25.02 |
| 701.6 | PA_18:0/18:1  | 798.0 | ± | 89.36 | 3591  | ± | 444.1 | 2377  | ± | 159.3 | 625.3 | ± | 73.44 | 2678  | ± | 180.4 | 2467  | ± | 203.4 |
| 699.5 | PA_18:0/18:2  | 294.4 | ± | 33.75 | 675.9 | ± | 112.7 | 340.1 | ± | 74.20 | 248.3 | ± | 24.20 | 189.3 | ± | 20.86 | 209.3 | ± | 16.84 |
| 699.5 | PA_18:1/18:1  | 1260  | ± | 220.9 | 10620 | ± | 1334  | 6639  | ± | 315.9 | 967.6 | ± | 180.4 | 10140 | ± | 691.6 | 8996  | ± | 795.4 |
| 697.5 | PA_18:0/18:3  | 467.0 | ± | 111.2 | 416.2 | ± | 168.7 | 272.9 | ± | 39.93 | 682.7 | ± | 220.4 | 226.4 | ± | 35.14 | 261.4 | ± | 30.17 |
| 731.6 | PA_18:0/20:0  | 577.7 | ± | 47.02 | 421.6 | ± | 73.15 | 393.2 | ± | 39.86 | 512.5 | ± | 32.34 | 204.2 | ± | 13.74 | 188.9 | ± | 19.92 |
| 729.6 | PA_18:0/20:1  | 612.2 | ± | 40.23 | 429.0 | ± | 40.75 | 472.6 | ± | 54.26 | 510.8 | ± | 70.10 | 362.7 | ± | 15.93 | 420.6 | ± | 50.59 |
| 727.6 | PA_18:0/20:2  | 657.0 | ± | 61.73 | 340.3 | ± | 43.44 | 421.5 | ± | 35.51 | 467.9 | ± | 59.80 | 256.2 | ± | 15.05 | 314.8 | ± | 27.39 |
| 725.6 | PA_18:0/20:3  | 287.6 | ± | 34.39 | 120.5 | ± | 17.49 | 265.7 | ± | 36.54 | 200.8 | ± | 16.53 | 103.2 | ± | 11.63 | 131.5 | ± | 17.79 |
| 723.6 | PA_18:0/20:4  | 291.1 | ± | 31.24 | 107.0 | ± | 13.86 | 236.1 | ± | 47.98 | 206.5 | ± | 26.05 | 77.29 | ± | 8.976 | 114.5 | ± | 16.80 |
| 721.6 | PA_18:0/20:5  | 188.3 | ± | 15.78 | 108.6 | ± | 25.48 | 214.9 | ± | 61.51 | 189.7 | ± | 19.24 | 70.84 | ± | 11.86 | 94.08 | ± | 8.405 |
| 759.6 | PA_18:0/22:0  | 503.9 | ± | 76.88 | 566.9 | ± | 58.12 | 404.2 | ± | 32.43 | 454.6 | ± | 42.25 | 260.2 | ± | 15.35 | 314.4 | ± | 35.09 |
| 757.6 | PA_18:0/22:1  | 181.3 | ± | 20.40 | 102.8 | ± | 12.45 | 124.4 | ± | 12.73 | 137.2 | ± | 11.48 | 98.98 | ± | 10.45 | 114.5 | ± | 13.44 |
| 755.6 | PA_18:0/22:2  | 235.2 | ± | 29.34 | 98.07 | ± | 16.50 | 136.7 | ± | 12.33 | 169.3 | ± | 13.98 | 99.52 | ± | 12.85 | 128.1 | ± | 15.49 |
| 753.6 | PA_18:0/22:3  | 268.2 | ± | 32.68 | 195.8 | ± | 30.19 | 259.4 | ± | 61.22 | 155.7 | ± | 17.04 | 127.9 | ± | 19.39 | 131.5 | ± | 15.67 |
| 751.6 | PA_18:0/22:4  | 245.1 | ± | 31.60 | 109.5 | ± | 20.06 | 170.9 | ± | 15.98 | 165.5 | ± | 15.49 | 58.23 | ± | 5.975 | 70.12 | ± | 12.23 |
| 749.6 | PA_18:0/22:5  | 190.9 | ± | 23.83 | 121.2 | ± | 16.59 | 172.0 | ± | 29.58 | 152.1 | ± | 17.46 | 107.6 | ± | 9.423 | 106.5 | ± | 9.866 |
| 747.6 | PA_18:0/22:6  | 513.0 | ± | 42.54 | 291.7 | ± | 27.63 | 357.1 | ± | 36.66 | 437.0 | ± | 39.89 | 224.8 | ± | 25.49 | 244.6 | ± | 31.25 |
| 695.5 | PA_18:1/18:3  | 180.2 | ± | 35.97 | 224.2 | ± | 32.71 | 180.4 | ± | 11.07 | 318.8 | ± | 104.5 | 365.4 | ± | 56.30 | 369.0 | ± | 61.14 |
| 725.6 | PA_18:1/20:2  | 318.5 | ± | 44.37 | 555.4 | ± | 55.61 | 483.8 | ± | 40.99 | 276.8 | ± | 35.21 | 573.3 | ± | 44.80 | 545.3 | ± | 46.07 |
| 721.6 | PA_18:1/20:4  | 170.5 | ± | 26.50 | 130.2 | ± | 18.14 | 194.9 | ± | 18.79 | 106.4 | ± | 9.151 | 234.0 | ± | 15.38 | 258.1 | ± | 21.14 |
| 757.6 | PA_18:1/22:0  | 231.6 | ± | 49.68 | 2127  | ± | 381.6 | 1068  | ± | 208.4 | 197.9 | ± | 16.02 | 1819  | ± | 132.4 | 1785  | ± | 205.1 |
| 659.5 | PA_p16:0/18:0 | 1179  | ± | 84.57 | 595.6 | ± | 68.76 | 667.7 | ± | 61.45 | 872.2 | ± | 76.03 | 307.5 | ± | 24.02 | 396.2 | ± | 32.39 |
| 657.5 | PA_p16:0/18:1 | 7.989 | ± | 4.090 | 31.47 | ± | 6.618 | 40.40 | ± | 6.078 | 3.758 | ± | 2.394 | 17.13 | ± | 4.686 | 16.86 | ± | 4.192 |
| 631.5 | PA_p18:0/14:0 | 71.59 | ± | 12.39 | 101.7 | ± | 13.21 | 87.87 | ± | 19.03 | 50.10 | ± | 7.280 | 57.83 | ± | 4.633 | 61.92 | ± | 8.465 |
| 659.5 | PA_p18:0/16:0 | 504.0 | ± | 39.56 | 738.0 | ± | 51.42 | 739.9 | ± | 152.3 | 414.4 | ± | 38.19 | 442.2 | ± | 37.72 | 449.9 | ± | 56.33 |
| 687.5 | PA_p18:0/18:0 | 498.0 | ± | 35.41 | 304.3 | ± | 32.13 | 489.8 | ± | 125.5 | 386.2 | ± | 30.81 | 217.8 | ± | 25.31 | 201.6 | ± | 17.66 |
| 685.5 | PA_p18:0/18:1 | 481.0 | ± | 58.47 | 3274  | ± | 441.2 | 2247  | ± | 139.3 | 363.7 | ± | 48.68 | 2683  | ± | 179.8 | 2345  | ± | 232.7 |



|       |              |       |   |        |       |   |        |       |   |        |       |   |        |       |   |        |       |   |        |
|-------|--------------|-------|---|--------|-------|---|--------|-------|---|--------|-------|---|--------|-------|---|--------|-------|---|--------|
| 455.3 | LPG_14:0_    | 18.61 | ± | 3.261  | 11.69 | ± | 2.016  | 10.62 | ± | 1.408  | 27.53 | ± | 4.652  | 11.60 | ± | 0.5764 | 9.116 | ± | 1.145  |
| 483.3 | LPG_16:0_    | 298.5 | ± | 56.03  | 176.8 | ± | 20.96  | 162.6 | ± | 22.56  | 447.5 | ± | 68.45  | 149.7 | ± | 6.871  | 139.7 | ± | 8.104  |
| 481.3 | LPG_16:1_    | 219.9 | ± | 53.43  | 139.7 | ± | 28.23  | 138.9 | ± | 30.97  | 307.6 | ± | 72.59  | 252.5 | ± | 35.04  | 181.6 | ± | 4.255  |
| 511.4 | LPG_18:0_    | 360.2 | ± | 58.95  | 189.7 | ± | 20.41  | 178.0 | ± | 30.54  | 538.0 | ± | 88.91  | 138.9 | ± | 5.851  | 131.5 | ± | 6.477  |
| 509.4 | LPG_18:1_    | 125.0 | ± | 24.79  | 100.2 | ± | 17.15  | 125.9 | ± | 32.05  | 224.9 | ± | 38.34  | 219.4 | ± | 23.91  | 192.7 | ± | 9.758  |
| 539.4 | LPG_20:0_    | 8.051 | ± | 1.447  | 5.902 | ± | 0.759  | 3.916 | ± | 1.774  | 12.24 | ± | 2.437  | 1.552 | ± | 1.000  | 3.165 | ± | 1.038  |
| 665.5 | PG_14:0/14:0 | 18.87 | ± | 0.3691 | 16.04 | ± | 0.8301 | 18.42 | ± | 2.225  | 21.60 | ± | 1.681  | 13.55 | ± | 1.044  | 15.48 | ± | 1.271  |
| 693.5 | PG_14:0/16:0 | 21.02 | ± | 3.339  | 17.76 | ± | 1.374  | 25.67 | ± | 9.939  | 39.75 | ± | 6.276  | 15.57 | ± | 1.532  | 15.73 | ± | 1.629  |
| 691.5 | PG_14:0/16:1 | 44.08 | ± | 9.178  | 38.75 | ± | 3.183  | 35.85 | ± | 5.515  | 37.67 | ± | 4.627  | 35.87 | ± | 1.818  | 34.77 | ± | 1.753  |
| 721.6 | PG_14:0/18:0 | 21.38 | ± | 3.291  | 12.12 | ± | 1.603  | 20.13 | ± | 7.005  | 35.88 | ± | 5.172  | 11.04 | ± | 0.895  | 11.95 | ± | 0.9244 |
| 719.6 | PG_14:0/18:1 | 16.35 | ± | 2.275  | 46.68 | ± | 8.546  | 35.64 | ± | 6.091  | 18.05 | ± | 2.951  | 59.97 | ± | 1.232  | 45.80 | ± | 2.452  |
| 717.6 | PG_14:0/18:2 | 2.188 | ± | 1.436  | 6.238 | ± | 1.415  | 6.650 | ± | 1.802  | 3.767 | ± | 0.8059 | 6.129 | ± | 1.466  | 6.195 | ± | 0.5748 |
| 749.6 | PG_14:0/20:0 | 123.8 | ± | 49.62  | 62.85 | ± | 14.56  | 49.56 | ± | 18.52  | 202.6 | ± | 51.32  | 63.6  | ± | 20.27  | 63.63 | ± | 16.82  |
| 747.6 | PG_14:0/20:1 | 23.77 | ± | 2.320  | 17.18 | ± | 1.807  | 16.19 | ± | 1.227  | 26.57 | ± | 3.354  | 16.28 | ± | 1.265  | 18.98 | ± | 0.7324 |
| 741.6 | PG_14:0/20:4 | 3.294 | ± | 1.473  | 7.964 | ± | 0.8921 | 5.393 | ± | 2.088  | 4.626 | ± | 1.822  | 5.904 | ± | 1.377  | 6.922 | ± | 0.8188 |
| 739.6 | PG_14:0/20:5 | 7.548 | ± | 0.8526 | 18.74 | ± | 1.295  | 13.29 | ± | 2.894  | 7.613 | ± | 1.308  | 15.43 | ± | 2.418  | 15.19 | ± | 0.7678 |
| 777.6 | PG_14:0/22:0 | 6.132 | ± | 2.338  | 4.847 | ± | 0.3599 | 4.639 | ± | 1.848  | 7.707 | ± | 1.137  | 3.348 | ± | 1.075  | 3.929 | ± | 0.8297 |
| 767.6 | PG_14:0/22:5 | 4.620 | ± | 2.027  | 7.627 | ± | 0.6825 | 5.343 | ± | 1.33   | 8.791 | ± | 1.754  | 8.253 | ± | 0.9644 | 7.514 | ± | 1.084  |
| 721.6 | PG_16:0/16:0 | 35.82 | ± | 5.167  | 21.59 | ± | 0.9761 | 32.39 | ± | 12.67  | 45.61 | ± | 6.858  | 25.46 | ± | 1.889  | 22.57 | ± | 1.206  |
| 719.6 | PG_16:0/16:1 | 67.31 | ± | 10.81  | 146.5 | ± | 17.10  | 105.9 | ± | 7.481  | 82.10 | ± | 13.13  | 152.7 | ± | 4.786  | 124.2 | ± | 2.625  |
| 749.6 | PG_16:0/18:0 | 27.31 | ± | 2.954  | 30.47 | ± | 4.014  | 30.24 | ± | 4.488  | 38.16 | ± | 5.512  | 51.48 | ± | 4.722  | 44.05 | ± | 3.492  |
| 747.6 | PG_16:0/18:1 | 40.33 | ± | 5.899  | 315.1 | ± | 53.19  | 193.7 | ± | 13.80  | 40.17 | ± | 4.724  | 491.0 | ± | 11.72  | 355.6 | ± | 9.767  |
| 745.6 | PG_16:0/18:2 | 16.46 | ± | 3.204  | 43.48 | ± | 5.802  | 33.58 | ± | 6.352  | 24.83 | ± | 2.320  | 51.38 | ± | 4.768  | 46.98 | ± | 5.480  |
| 743.6 | PG_16:0/18:3 | 11.91 | ± | 1.835  | 9.514 | ± | 0.9768 | 11.38 | ± | 2.001  | 13.33 | ± | 0.9484 | 17.09 | ± | 1.179  | 17.29 | ± | 1.981  |
| 777.6 | PG_16:0/20:0 | 31.91 | ± | 5.222  | 24.56 | ± | 1.587  | 24.83 | ± | 3.512  | 41.16 | ± | 4.674  | 26.56 | ± | 1.561  | 25.68 | ± | 1.579  |
| 775.6 | PG_16:0/20:1 | 18.40 | ± | 2.925  | 32.67 | ± | 4.946  | 42.27 | ± | 5.965  | 18.90 | ± | 3.321  | 46.65 | ± | 5.315  | 49.34 | ± | 5.389  |
| 773.6 | PG_16:0/20:2 | 8.91  | ± | 1.431  | 17.42 | ± | 3.966  | 20.91 | ± | 5.016  | 8.743 | ± | 1.265  | 27.83 | ± | 6.195  | 29.31 | ± | 5.360  |
| 771.6 | PG_16:0/20:3 | 11.51 | ± | 2.233  | 28.39 | ± | 7.774  | 21.12 | ± | 2.795  | 15.31 | ± | 1.398  | 84.96 | ± | 6.609  | 61.99 | ± | 5.167  |
| 769.6 | PG_16:0/20:4 | 10.07 | ± | 1.270  | 25.48 | ± | 4.956  | 20.03 | ± | 4.098  | 14.25 | ± | 2.004  | 35.15 | ± | 4.266  | 29.65 | ± | 3.166  |
| 767.6 | PG_16:0/20:5 | 19.69 | ± | 2.516  | 67.67 | ± | 8.716  | 47.25 | ± | 9.529  | 27.24 | ± | 4.469  | 77.84 | ± | 6.185  | 68.07 | ± | 4.247  |
| 805.7 | PG_16:0/22:0 | 59.25 | ± | 10.63  | 38.33 | ± | 3.916  | 41.05 | ± | 5.707  | 84.25 | ± | 10.69  | 37.41 | ± | 2.391  | 39.43 | ± | 3.484  |
| 803.7 | PG_16:0/22:1 | 8.801 | ± | 1.426  | 6.198 | ± | 0.8082 | 5.925 | ± | 0.656  | 10.30 | ± | 1.919  | 6.445 | ± | 1.381  | 6.041 | ± | 0.6865 |
| 801.7 | PG_16:0/22:2 | 12.04 | ± | 1.841  | 7.792 | ± | 0.5152 | 8.105 | ± | 0.8135 | 19.27 | ± | 2.544  | 7.419 | ± | 0.4443 | 7.598 | ± | 0.7094 |
| 799.6 | PG_16:0/22:3 | 8.614 | ± | 1.411  | 12.45 | ± | 1.648  | 13.25 | ± | 1.441  | 10.33 | ± | 1.533  | 16.24 | ± | 1.037  | 13.01 | ± | 0.5811 |
| 797.6 | PG_16:0/22:4 | 11.07 | ± | 1.399  | 18.38 | ± | 2.657  | 14.80 | ± | 3.557  | 15.74 | ± | 2.250  | 25.16 | ± | 3.176  | 18.20 | ± | 1.438  |
| 795.6 | PG_16:0/22:5 | 52.23 | ± | 10.36  | 48.54 | ± | 3.012  | 42.23 | ± | 8.440  | 78.34 | ± | 13.21  | 60.96 | ± | 5.084  | 56.46 | ± | 3.221  |

|       |              |       |   |        |       |   |        |       |   |        |       |   |        |       |   |        |       |   |        |
|-------|--------------|-------|---|--------|-------|---|--------|-------|---|--------|-------|---|--------|-------|---|--------|-------|---|--------|
| 793.6 | PG_16:0/22:6 | 58.76 | ± | 10.35  | 65.45 | ± | 4.194  | 52.76 | ± | 7.700  | 87.49 | ± | 12.04  | 74.44 | ± | 6.115  | 60.83 | ± | 4.316  |
| 717.6 | PG_16:1/16:1 | 209.8 | ± | 25.49  | 415.9 | ± | 67.20  | 306.4 | ± | 32.82  | 229.6 | ± | 27.96  | 460.4 | ± | 11.51  | 383.1 | ± | 12.58  |
| 747.6 | PG_16:1/18:0 | 112.3 | ± | 12.16  | 116.6 | ± | 10.82  | 129.3 | ± | 12.79  | 127.0 | ± | 10.60  | 141.3 | ± | 7.733  | 118.9 | ± | 6.229  |
| 745.6 | PG_16:1/18:1 | 1287  | ± | 269.6  | 663.0 | ± | 63.54  | 824.5 | ± | 88.40  | 875.5 | ± | 104.5  | 823.7 | ± | 62.58  | 879.5 | ± | 76.48  |
| 743.6 | PG_16:1/18:2 | 433.2 | ± | 135.7  | 334.3 | ± | 53.68  | 339.6 | ± | 92.89  | 525.3 | ± | 106.9  | 462.7 | ± | 68.25  | 532.1 | ± | 79.37  |
| 741.6 | PG_16:1/18:3 | 12.66 | ± | 2.759  | 73.28 | ± | 23.37  | 47.38 | ± | 15.34  | 16.18 | ± | 2.588  | 109.3 | ± | 18.40  | 89.47 | ± | 12.36  |
| 775.6 | PG_16:1/20:0 | 29.38 | ± | 5.311  | 115.5 | ± | 21.83  | 84.36 | ± | 11.27  | 32.48 | ± | 7.343  | 148.7 | ± | 10.99  | 114.0 | ± | 6.931  |
| 773.6 | PG_16:1/20:1 | 35.40 | ± | 7.261  | 218.2 | ± | 40.83  | 230.9 | ± | 33.11  | 26.57 | ± | 2.934  | 303.4 | ± | 40.73  | 314.2 | ± | 31.95  |
| 771.6 | PG_16:1/20:2 | 25.02 | ± | 4.176  | 108.9 | ± | 18.27  | 109.3 | ± | 30.03  | 23.54 | ± | 2.316  | 177.1 | ± | 41.94  | 205.6 | ± | 37.12  |
| 769.6 | PG_16:1/20:3 | 137.6 | ± | 19.65  | 146.4 | ± | 13.82  | 166.6 | ± | 15.79  | 161.8 | ± | 17.68  | 170.5 | ± | 11.41  | 138.7 | ± | 6.844  |
| 767.6 | PG_16:1/20:4 | 84.29 | ± | 22.41  | 348.2 | ± | 42.92  | 213.2 | ± | 52.00  | 110.1 | ± | 20.19  | 357.7 | ± | 35.36  | 325.0 | ± | 12.02  |
| 765.6 | PG_16:1/20:5 | 45.19 | ± | 12.37  | 729.2 | ± | 112.9  | 380.8 | ± | 98.63  | 39.69 | ± | 8.019  | 688.3 | ± | 71.96  | 649.7 | ± | 31.17  |
| 803.7 | PG_16:1/22:0 | 57.24 | ± | 10.31  | 74.34 | ± | 15.34  | 64.16 | ± | 11.78  | 64.63 | ± | 9.434  | 111.4 | ± | 11.64  | 95.27 | ± | 3.996  |
| 801.7 | PG_16:1/22:1 | 20.89 | ± | 3.546  | 21.92 | ± | 3.412  | 18.70 | ± | 3.011  | 25.02 | ± | 1.605  | 32.12 | ± | 3.683  | 29.03 | ± | 2.793  |
| 799.6 | PG_16:1/22:2 | 15.82 | ± | 2.284  | 15.51 | ± | 2.173  | 17.92 | ± | 1.32   | 16.72 | ± | 2.324  | 23.87 | ± | 2.137  | 19.72 | ± | 1.562  |
| 797.6 | PG_16:1/22:3 | 19.41 | ± | 3.571  | 81.84 | ± | 17.11  | 70.46 | ± | 8.990  | 17.01 | ± | 0.4986 | 116.7 | ± | 4.859  | 74.62 | ± | 5.072  |
| 795.6 | PG_16:1/22:4 | 19.15 | ± | 4.537  | 161.1 | ± | 28.09  | 88.87 | ± | 24.74  | 22.67 | ± | 5.136  | 214.5 | ± | 21.55  | 178.7 | ± | 11.86  |
| 793.6 | PG_16:1/22:5 | 47.25 | ± | 10.80  | 324.6 | ± | 59.42  | 186.0 | ± | 52.79  | 63.66 | ± | 16.09  | 438.8 | ± | 45.28  | 413.2 | ± | 17.82  |
| 791.6 | PG_16:1/22:6 | 94.75 | ± | 23.70  | 574.2 | ± | 102.0  | 386.6 | ± | 59.44  | 86.56 | ± | 18.24  | 741.0 | ± | 55.37  | 584.4 | ± | 37.87  |
| 777.6 | PG_18:0/18:0 | 22.22 | ± | 3.823  | 21.28 | ± | 2.160  | 20.62 | ± | 1.669  | 28.37 | ± | 2.676  | 45.25 | ± | 4.439  | 32.00 | ± | 1.853  |
| 775.6 | PG_18:0/18:1 | 30.82 | ± | 6.555  | 174.7 | ± | 29.08  | 154.4 | ± | 20.08  | 33.20 | ± | 5.068  | 263.3 | ± | 17.20  | 237.0 | ± | 18.27  |
| 773.6 | PG_18:0/18:2 | 12.22 | ± | 1.582  | 18.13 | ± | 1.821  | 16.11 | ± | 2.369  | 18.62 | ± | 3.459  | 28.78 | ± | 2.796  | 25.58 | ± | 3.131  |
| 771.6 | PG_18:0/18:3 | 12.47 | ± | 1.771  | 8.715 | ± | 1.310  | 8.785 | ± | 1.991  | 12.12 | ± | 1.468  | 11.89 | ± | 1.017  | 9.733 | ± | 1.242  |
| 805.7 | PG_18:0/20:0 | 36.54 | ± | 7.801  | 16.91 | ± | 1.480  | 19.68 | ± | 2.133  | 43.30 | ± | 4.654  | 22.90 | ± | 1.256  | 18.80 | ± | 0.5602 |
| 803.7 | PG_18:0/20:1 | 13.66 | ± | 2.515  | 11.72 | ± | 1.028  | 10.80 | ± | 1.436  | 20.05 | ± | 2.717  | 12.26 | ± | 1.461  | 13.39 | ± | 0.5842 |
| 801.7 | PG_18:0/20:2 | 8.060 | ± | 1.435  | 4.580 | ± | 1.009  | 4.367 | ± | 1.595  | 10.58 | ± | 1.379  | 6.560 | ± | 1.564  | 4.941 | ± | 1.847  |
| 799.6 | PG_18:0/20:3 | 10.19 | ± | 1.791  | 12.33 | ± | 2.712  | 11.41 | ± | 2.231  | 13.41 | ± | 1.697  | 37.11 | ± | 3.521  | 24.71 | ± | 2.053  |
| 797.6 | PG_18:0/20:4 | 9.540 | ± | 0.9784 | 14.31 | ± | 2.244  | 9.523 | ± | 2.752  | 10.06 | ± | 1.348  | 20.86 | ± | 2.848  | 17.85 | ± | 1.208  |
| 795.6 | PG_18:0/20:5 | 19.42 | ± | 2.353  | 43.52 | ± | 4.327  | 28.17 | ± | 6.031  | 23.25 | ± | 2.967  | 49.52 | ± | 5.877  | 44.94 | ± | 2.460  |
| 833.7 | PG_18:0/22:0 | 48.15 | ± | 8.939  | 30.26 | ± | 6.231  | 30.66 | ± | 5.116  | 69.63 | ± | 8.751  | 25.37 | ± | 2.595  | 23.82 | ± | 3.088  |
| 831.7 | PG_18:0/22:1 | 6.360 | ± | 1.557  | 4.930 | ± | 1.202  | 4.668 | ± | 0.6604 | 13.53 | ± | 1.735  | 4.647 | ± | 0.3621 | 1.887 | ± | 1.194  |
| 829.7 | PG_18:0/22:2 | 13.94 | ± | 2.175  | 5.274 | ± | 0.7269 | 8.106 | ± | 1.178  | 16.08 | ± | 1.717  | 4.543 | ± | 1.090  | 5.115 | ± | 0.4917 |
| 827.7 | PG_18:0/22:3 | 7.890 | ± | 2.290  | 3.662 | ± | 0.7545 | 3.769 | ± | 0.8276 | 10.84 | ± | 1.314  | 6.287 | ± | 0.4595 | 5.327 | ± | 0.4625 |
| 825.7 | PG_18:0/22:4 | 10.14 | ± | 1.776  | 8.543 | ± | 0.9725 | 7.810 | ± | 1.887  | 14.64 | ± | 2.225  | 12.92 | ± | 1.444  | 11.90 | ± | 1.174  |
| 823.7 | PG_18:0/22:5 | 51.69 | ± | 10.31  | 34.92 | ± | 3.594  | 33.00 | ± | 5.853  | 80.36 | ± | 13.70  | 45.72 | ± | 5.624  | 42.89 | ± | 3.104  |
| 821.7 | PG_18:0/22:6 | 81.37 | ± | 13.24  | 56.64 | ± | 4.537  | 51.33 | ± | 8.128  | 103.7 | ± | 14.36  | 53.86 | ± | 5.467  | 50.90 | ± | 2.683  |

|       |               |       |   |       |       |   |        |       |   |       |       |   |       |       |   |        |       |   |        |
|-------|---------------|-------|---|-------|-------|---|--------|-------|---|-------|-------|---|-------|-------|---|--------|-------|---|--------|
| 773.6 | PG_18:1/18:1  | 65.05 | ± | 15.62 | 595.4 | ± | 118.2  | 613.9 | ± | 82.90 | 34.79 | ± | 3.025 | 834.3 | ± | 126.8  | 888.6 | ± | 105.5  |
| 771.6 | PG_18:1/18:2  | 32.67 | ± | 8.350 | 358.0 | ± | 81.59  | 329.7 | ± | 104.1 | 23.96 | ± | 3.681 | 643.6 | ± | 123.3  | 690.1 | ± | 119.5  |
| 769.6 | PG_18:1/18:3  | 5.610 | ± | 1.892 | 51.11 | ± | 14.75  | 39.33 | ± | 13.17 | 9.324 | ± | 1.875 | 104.0 | ± | 18.37  | 85.78 | ± | 11.53  |
| 803.7 | PG_18:1/20:0  | 19.66 | ± | 3.662 | 86.55 | ± | 20.70  | 77.16 | ± | 13.69 | 23.31 | ± | 3.975 | 169.3 | ± | 15.03  | 129.8 | ± | 8.844  |
| 801.7 | PG_18:1/20:1  | 13.97 | ± | 2.563 | 130.7 | ± | 23.86  | 143.2 | ± | 23.02 | 14.59 | ± | 1.634 | 246.8 | ± | 28.22  | 264.8 | ± | 33.47  |
| 799.6 | PG_18:1/20:2  | 9.353 | ± | 2.261 | 86.90 | ± | 16.48  | 86.81 | ± | 21.00 | 9.544 | ± | 1.805 | 174.9 | ± | 28.44  | 190.1 | ± | 33.19  |
| 797.6 | PG_18:1/20:3  | 16.75 | ± | 4.240 | 196.4 | ± | 42.97  | 154.7 | ± | 20.04 | 12.29 | ± | 2.199 | 293.1 | ± | 19.02  | 177.8 | ± | 11.82  |
| 795.6 | PG_18:1/20:4  | 15.12 | ± | 5.445 | 292.8 | ± | 58.52  | 175.0 | ± | 48.71 | 15.27 | ± | 3.434 | 456.9 | ± | 47.90  | 370.5 | ± | 23.78  |
| 793.6 | PG_18:1/20:5  | 24.40 | ± | 6.099 | 531.7 | ± | 102.8  | 303.9 | ± | 93.61 | 31.95 | ± | 7.033 | 758.3 | ± | 84.66  | 719.7 | ± | 32.50  |
| 831.7 | PG_18:1/22:0  | 25.33 | ± | 6.058 | 46.84 | ± | 8.156  | 41.43 | ± | 9.400 | 27.08 | ± | 3.098 | 92.98 | ± | 7.223  | 87.91 | ± | 6.408  |
| 829.7 | PG_18:1/22:1  | 7.281 | ± | 1.930 | 23.94 | ± | 3.713  | 19.18 | ± | 3.463 | 9.289 | ± | 1.174 | 42.71 | ± | 3.631  | 30.98 | ± | 2.988  |
| 827.7 | PG_18:1/22:2  | 5.628 | ± | 1.894 | 22.45 | ± | 4.618  | 17.63 | ± | 2.059 | 9.609 | ± | 2.961 | 34.33 | ± | 3.463  | 28.63 | ± | 1.571  |
| 825.7 | PG_18:1/22:3  | 6.900 | ± | 1.736 | 59.51 | ± | 13.80  | 46.57 | ± | 6.419 | 6.210 | ± | 1.441 | 108.4 | ± | 4.163  | 74.88 | ± | 3.787  |
| 823.7 | PG_18:1/22:4  | 7.689 | ± | 2.603 | 105.7 | ± | 24.68  | 64.02 | ± | 18.44 | 11.36 | ± | 1.742 | 199.1 | ± | 20.48  | 168.5 | ± | 8.835  |
| 821.7 | PG_18:1/22:5  | 21.33 | ± | 3.673 | 183.4 | ± | 41.49  | 117.4 | ± | 34.82 | 37.65 | ± | 7.577 | 354.7 | ± | 40.51  | 330.5 | ± | 16.93  |
| 679.5 | PG_a16:0/14:0 | 39.01 | ± | 5.234 | 36.68 | ± | 3.215  | 40.84 | ± | 2.228 | 50.04 | ± | 7.059 | 48.04 | ± | 4.440  | 38.92 | ± | 2.168  |
| 707.6 | PG_a16:0/16:0 | 14.82 | ± | 2.802 | 10.44 | ± | 0.8365 | 14.95 | ± | 5.790 | 22.20 | ± | 3.112 | 9.519 | ± | 0.8512 | 9.759 | ± | 1.301  |
| 735.6 | PG_a16:0/18:0 | 15.35 | ± | 2.612 | 6.508 | ± | 0.6168 | 12.81 | ± | 5.783 | 26.68 | ± | 3.371 | 6.574 | ± | 0.4691 | 8.789 | ± | 0.9315 |
| 735.6 | PG_a18:0/16:0 | 12.12 | ± | 2.120 | 12.29 | ± | 0.9862 | 11.91 | ± | 5.073 | 19.04 | ± | 2.988 | 12.74 | ± | 1.489  | 10.47 | ± | 1.597  |
| 763.6 | PG_a18:0/18:0 | 10.73 | ± | 1.998 | 7.513 | ± | 0.9593 | 8.461 | ± | 1.976 | 16.78 | ± | 2.166 | 7.600 | ± | 0.5586 | 7.517 | ± | 1.037  |
| 735.6 | PG_a20:0/14:0 | 75.24 | ± | 15.90 | 76.15 | ± | 12.80  | 73.83 | ± | 21.06 | 116.5 | ± | 26.37 | 76.02 | ± | 13.14  | 61.74 | ± | 7.627  |
| 763.6 | PG_a20:0/16:0 | 12.46 | ± | 2.151 | 20.45 | ± | 1.782  | 17.57 | ± | 3.400 | 18.38 | ± | 2.527 | 42.93 | ± | 3.877  | 34.95 | ± | 3.749  |
| 791.6 | PG_a20:0/18:0 | 11.69 | ± | 2.017 | 11.06 | ± | 0.7681 | 8.377 | ± | 1.066 | 17.33 | ± | 2.370 | 11.37 | ± | 1.422  | 10.28 | ± | 0.736  |
| 677.5 | PG_p16:0/14:0 | 14.04 | ± | 4.350 | 18.61 | ± | 1.475  | 17.79 | ± | 5.208 | 31.32 | ± | 6.102 | 31.07 | ± | 6.028  | 31.19 | ± | 4.682  |
| 705.6 | PG_p16:0/16:0 | 20.43 | ± | 3.516 | 15.70 | ± | 2.234  | 14.96 | ± | 2.909 | 31.51 | ± | 4.946 | 10.66 | ± | 1.808  | 9.896 | ± | 0.8863 |
| 703.6 | PG_p16:0/16:1 | 24.99 | ± | 3.947 | 147.8 | ± | 21.21  | 33.35 | ± | 5.763 | 32.02 | ± | 4.708 | 42.68 | ± | 4.215  | 27.65 | ± | 1.431  |
| 733.6 | PG_p16:0/18:0 | 22.02 | ± | 3.531 | 14.52 | ± | 1.554  | 16.68 | ± | 3.726 | 35.65 | ± | 5.174 | 9.623 | ± | 1.134  | 10.29 | ± | 0.7895 |
| 733.6 | PG_p18:0/16:0 | 17.93 | ± | 3.307 | 19.79 | ± | 0.9314 | 16.51 | ± | 3.188 | 30.29 | ± | 4.138 | 17.43 | ± | 1.755  | 17.32 | ± | 1.242  |
| 731.6 | PG_p18:0/16:1 | 25.02 | ± | 6.297 | 75.67 | ± | 12.76  | 36.99 | ± | 9.248 | 42.52 | ± | 10.86 | 54.11 | ± | 4.637  | 48.34 | ± | 2.379  |
| 761.6 | PG_p18:0/18:0 | 18.62 | ± | 2.237 | 12.56 | ± | 1.308  | 11.89 | ± | 2.014 | 29.03 | ± | 5.360 | 8.876 | ± | 0.9712 | 9.371 | ± | 0.6619 |
| 759.6 | PG_p18:0/18:1 | 9.748 | ± | 2.562 | 110.6 | ± | 26.22  | 41.82 | ± | 11.40 | 15.29 | ± | 3.338 | 80.64 | ± | 6.070  | 64.27 | ± | 1.895  |
| 733.6 | PG_p20:0/14:0 | 10.17 | ± | 2.218 | 8.447 | ± | 1.125  | 7.977 | ± | 2.878 | 18.18 | ± | 2.826 | 13.16 | ± | 1.994  | 12.65 | ± | 1.846  |
| 761.6 | PG_p20:0/16:0 | 14.60 | ± | 1.808 | 18.78 | ± | 2.023  | 14.47 | ± | 2.695 | 19.42 | ± | 3.036 | 25.30 | ± | 3.394  | 20.81 | ± | 2.647  |
| 759.6 | PG_p20:0/16:1 | 24.68 | ± | 2.824 | 52.99 | ± | 7.280  | 50.30 | ± | 7.689 | 20.51 | ± | 2.528 | 62.44 | ± | 4.261  | 62.37 | ± | 4.667  |
| 789.6 | PG_p20:0/18:0 | 10.64 | ± | 1.571 | 9.826 | ± | 0.9011 | 6.344 | ± | 1.453 | 17.60 | ± | 2.025 | 13.15 | ± | 0.8710 | 11.96 | ± | 0.954  |
| 787.6 | PG_p20:0/18:1 | 11.70 | ± | 2.828 | 52.00 | ± | 9.677  | 47.62 | ± | 8.598 | 10.97 | ± | 1.682 | 77.81 | ± | 5.232  | 81.84 | ± | 10.90  |

|       |               |       |   |       |       |   |        |       |   |        |       |   |        |       |   |        |       |   |        |
|-------|---------------|-------|---|-------|-------|---|--------|-------|---|--------|-------|---|--------|-------|---|--------|-------|---|--------|
| 543.4 | LPI_14:0_     | 6.944 | ± | 1.782 | 5.571 | ± | 1.299  | 5.214 | ± | 1.281  | 11.46 | ± | 1.493  | 3.480 | ± | 0.7041 | 2.161 | ± | 0.9698 |
| 569.4 | LPI_16:1_     | 61.73 | ± | 13.02 | 43.81 | ± | 8.204  | 51.82 | ± | 8.581  | 88.07 | ± | 17.12  | 64.95 | ± | 4.718  | 61.40 | ± | 1.542  |
| 571.4 | LPI_16:0_     | 91.87 | ± | 16.72 | 55.19 | ± | 4.886  | 58.53 | ± | 8.703  | 127.3 | ± | 16.00  | 42.62 | ± | 1.887  | 42.35 | ± | 2.358  |
| 597.4 | LPI_18:1_     | 36.80 | ± | 7.058 | 30.73 | ± | 4.517  | 36.34 | ± | 7.759  | 66.66 | ± | 12.21  | 54.65 | ± | 4.466  | 59.89 | ± | 1.846  |
| 599.4 | LPI_18:0_     | 95.51 | ± | 14.73 | 51.23 | ± | 6.379  | 55.30 | ± | 7.375  | 134.4 | ± | 17.98  | 33.57 | ± | 1.368  | 36.84 | ± | 2.037  |
| 753.6 | PI_14:0/14:0  | 10.05 | ± | 1.133 | 7.214 | ± | 0.8114 | 3.987 | ± | 1.428  | 10.48 | ± | 1.766  | 5.775 | ± | 1.904  | 5.718 | ± | 1.521  |
| 779.6 | PI_14:0/16:1  | 16.69 | ± | 2.444 | 135.9 | ± | 30.16  | 75.62 | ± | 16.54  | 25.92 | ± | 5.227  | 163.1 | ± | 19.37  | 129.6 | ± | 9.399  |
| 781.6 | PI_14:0/16:0  | 14.85 | ± | 1.496 | 25.66 | ± | 3.121  | 18.01 | ± | 2.786  | 22.18 | ± | 3.246  | 27.65 | ± | 2.896  | 22.37 | ± | 1.604  |
| 805.7 | PI_16:1/16:1  | 116.1 | ± | 17.11 | 534.1 | ± | 106.0  | 290.8 | ± | 31.06  | 113.3 | ± | 19.22  | 476.8 | ± | 34.22  | 312.0 | ± | 7.632  |
| 807.7 | PI_14:0/18:1  | 16.28 | ± | 2.566 | 156.6 | ± | 36.19  | 84.93 | ± | 12.67  | 17.94 | ± | 3.702  | 201.9 | ± | 18.29  | 154.7 | ± | 6.340  |
| 807.7 | PI_16:0/16:1  | 121.0 | ± | 20.84 | 617.0 | ± | 111.5  | 387.9 | ± | 52.50  | 110.6 | ± | 16.06  | 556.5 | ± | 36.83  | 415.9 | ± | 22.51  |
| 809.7 | PI_14:0/18:0  | 20.98 | ± | 3.158 | 16.29 | ± | 1.328  | 15.22 | ± | 2.710  | 24.54 | ± | 2.946  | 16.45 | ± | 1.449  | 13.13 | ± | 0.926  |
| 809.7 | PI_16:0/16:0  | 44.42 | ± | 5.764 | 76.01 | ± | 8.150  | 56.75 | ± | 3.041  | 67.55 | ± | 10.29  | 67.77 | ± | 3.837  | 52.52 | ± | 3.753  |
| 831.7 | PI_16:0/18:3  | 10.75 | ± | 3.207 | 10.40 | ± | 0.8318 | 5.714 | ± | 0.3687 | 9.574 | ± | 1.402  | 54.03 | ± | 9.580  | 7.601 | ± | 0.9943 |
| 831.7 | PI_16:1/18:2  | 24.78 | ± | 6.285 | 34.26 | ± | 2.500  | 20.98 | ± | 3.672  | 20.86 | ± | 3.173  | 44.27 | ± | 2.265  | 39.11 | ± | 2.814  |
| 833.7 | PI_16:1/18:1  | 75.96 | ± | 14.32 | 601.4 | ± | 142.6  | 315.8 | ± | 19.67  | 108.2 | ± | 23.09  | 673.7 | ± | 31.21  | 464.7 | ± | 12.63  |
| 833.7 | PI_16:0/18:2  | 22.26 | ± | 3.643 | 37.33 | ± | 4.377  | 16.35 | ± | 0.4575 | 26.88 | ± | 4.928  | 24.37 | ± | 1.005  | 16.62 | ± | 2.033  |
| 835.7 | PI_16:1/18:0  | 100.8 | ± | 16.69 | 259.8 | ± | 49.09  | 170.4 | ± | 6.740  | 142.1 | ± | 22.19  | 271.7 | ± | 6.788  | 210.6 | ± | 6.478  |
| 835.7 | PI_16:0/18:1  | 131.0 | ± | 40.41 | 1493  | ± | 379.6  | 828.0 | ± | 80.28  | 94.34 | ± | 20.47  | 1701  | ± | 98.23  | 1166  | ± | 53.02  |
| 837.7 | PI_14:0/20:0  | 13.30 | ± | 2.848 | 7.260 | ± | 0.7578 | 8.159 | ± | 2.084  | 17.65 | ± | 1.736  | 4.789 | ± | 1.101  | 6.704 | ± | 1.650  |
| 837.7 | PI_16:0/18:0  | 52.37 | ± | 6.019 | 95.28 | ± | 15.01  | 66.04 | ± | 2.318  | 74.07 | ± | 11.46  | 101.2 | ± | 4.853  | 79.51 | ± | 5.201  |
| 849.7 | PI_p18:0/18:0 | 18.01 | ± | 3.987 | 123.6 | ± | 21.68  | 73.76 | ± | 11.60  | 24.98 | ± | 4.519  | 158.7 | ± | 15.08  | 111.2 | ± | 8.126  |
| 849.7 | PI_p20:0/16:0 | 38.25 | ± | 7.363 | 312.1 | ± | 67.40  | 194.9 | ± | 39.24  | 51.50 | ± | 7.462  | 534.2 | ± | 47.83  | 386.4 | ± | 37.80  |
| 857.7 | PI_16:1/20:3  | 14.72 | ± | 2.985 | 15.27 | ± | 2.777  | 9.862 | ± | 1.320  | 15.22 | ± | 2.104  | 15.34 | ± | 1.292  | 16.06 | ± | 1.946  |
| 857.7 | PI_16:0/20:4  | 11.63 | ± | 1.797 | 9.535 | ± | 1.133  | 9.728 | ± | 0.5850 | 14.08 | ± | 2.314  | 10.64 | ± | 1.972  | 8.160 | ± | 0.7783 |
| 857.7 | PI_18:1/18:3  | 3.732 | ± | 1.256 | 18.50 | ± | 3.564  | 16.09 | ± | 2.556  | 4.610 | ± | 0.9968 | 74.58 | ± | 10.46  | 21.17 | ± | 2.086  |
| 859.7 | PI_16:1/20:2  | 16.89 | ± | 3.679 | 20.00 | ± | 3.281  | 14.70 | ± | 2.786  | 19.78 | ± | 1.896  | 24.56 | ± | 2.188  | 21.81 | ± | 1.160  |
| 859.7 | PI_16:0/20:3  | 6.961 | ± | 1.075 | 3.643 | ± | 1.245  | 5.228 | ± | 0.6344 | 11.44 | ± | 2.198  | 4.710 | ± | 0.9817 | 3.289 | ± | 1.098  |
| 859.7 | PI_18:0/18:3  | 5.819 | ± | 1.332 | 6.833 | ± | 0.5662 | 3.900 | ± | 0.8732 | 9.815 | ± | 2.040  | 44.39 | ± | 10.15  | 2.598 | ± | 0.8331 |
| 859.7 | PI_18:1/18:2  | 5.828 | ± | 1.463 | 24.48 | ± | 2.283  | 16.15 | ± | 3.420  | 8.017 | ± | 2.121  | 38.21 | ± | 1.857  | 28.86 | ± | 2.540  |
| 861.7 | PI_16:1/20:1  | 11.87 | ± | 2.29  | 32.01 | ± | 6.180  | 20.75 | ± | 5.635  | 19.31 | ± | 3.970  | 44.50 | ± | 5.073  | 33.19 | ± | 4.608  |
| 861.7 | PI_16:0/20:2  | 7.445 | ± | 1.115 | 5.848 | ± | 1.254  | 5.647 | ± | 0.7554 | 12.57 | ± | 1.984  | 7.564 | ± | 0.7399 | 7.259 | ± | 0.5544 |
| 861.7 | PI_18:0/18:2  | 13.10 | ± | 2.764 | 12.12 | ± | 1.335  | 10.09 | ± | 1.221  | 18.37 | ± | 2.134  | 14.70 | ± | 1.296  | 8.487 | ± | 0.9896 |
| 861.7 | PI_18:1/18:1  | 12.12 | ± | 2.739 | 145.6 | ± | 38.64  | 77.40 | ± | 12.03  | 14.38 | ± | 3.742  | 227.0 | ± | 8.676  | 167.0 | ± | 6.518  |
| 863.7 | PI_14:0/22:1  | 19.68 | ± | 4.252 | 10.05 | ± | 1.067  | 13.69 | ± | 1.238  | 32.42 | ± | 5.564  | 10.85 | ± | 1.334  | 11.04 | ± | 1.207  |
| 863.7 | PI_16:1/20:0  | 116.3 | ± | 26.62 | 72.86 | ± | 6.976  | 81.60 | ± | 18.52  | 151.1 | ± | 30.22  | 119.0 | ± | 8.510  | 100.9 | ± | 4.789  |

|       |              |        |   |        |       |   |        |       |   |        |       |   |        |       |   |        |       |   |        |
|-------|--------------|--------|---|--------|-------|---|--------|-------|---|--------|-------|---|--------|-------|---|--------|-------|---|--------|
| 863.7 | PI_16:0/20:1 | 13.70  | ± | 2.141  | 14.75 | ± | 0.6582 | 12.63 | ± | 1.436  | 18.86 | ± | 2.386  | 14.33 | ± | 1.804  | 14.17 | ± | 2.284  |
| 863.7 | PI_18:0/18:1 | 59.23  | ± | 11.36  | 471.4 | ± | 140.4  | 257.9 | ± | 17.14  | 61.07 | ± | 10.47  | 664.0 | ± | 21.76  | 467.0 | ± | 11.75  |
| 865.7 | PI_16:0/20:0 | 147.1  | ± | 23.97  | 71.09 | ± | 8.850  | 83.77 | ± | 13.11  | 211.1 | ± | 27.29  | 54.58 | ± | 6.651  | 61.96 | ± | 3.809  |
| 865.7 | PI_18:0/18:0 | 56.49  | ± | 7.249  | 56.76 | ± | 8.011  | 48.81 | ± | 2.510  | 84.45 | ± | 12.24  | 76.73 | ± | 5.432  | 58.95 | ± | 5.287  |
| 883.7 | PI_16:1/22:4 | 10.35  | ± | 2.375  | 14.41 | ± | 1.391  | 14.41 | ± | 4.219  | 16.01 | ± | 3.736  | 16.81 | ± | 1.969  | 19.96 | ± | 1.212  |
| 883.7 | PI_16:0/22:5 | 8.128  | ± | 1.657  | 6.754 | ± | 0.6123 | 6.156 | ± | 0.9127 | 10.82 | ± | 1.296  | 6.660 | ± | 0.5817 | 6.793 | ± | 0.5478 |
| 883.7 | PI_18:1/20:4 | 3.244  | ± | 1.530  | 13.16 | ± | 2.278  | 11.98 | ± | 1.831  | 8.225 | ± | 2.119  | 23.21 | ± | 2.351  | 20.00 | ± | 2.136  |
| 883.7 | PI_18:0/20:5 | 19.05  | ± | 1.945  | 11.55 | ± | 1.389  | 12.34 | ± | 1.276  | 27.40 | ± | 4.793  | 9.352 | ± | 1.004  | 10.81 | ± | 1.259  |
| 885.7 | PI_16:1/22:3 | 10.79  | ± | 1.926  | 15.20 | ± | 1.681  | 12.36 | ± | 3.376  | 14.97 | ± | 3.369  | 13.02 | ± | 2.291  | 16.22 | ± | 1.267  |
| 885.7 | PI_18:1/20:3 | 3.144  | ± | 1.064  | 9.086 | ± | 2.516  | 9.124 | ± | 1.493  | 3.695 | ± | 1.209  | 15.39 | ± | 1.685  | 12.73 | ± | 0.4656 |
| 885.7 | PI_18:0/20:4 | 11.64  | ± | 0.9665 | 7.422 | ± | 1.029  | 7.463 | ± | 1.559  | 16.17 | ± | 3.132  | 3.143 | ± | 1.419  | 5.279 | ± | 1.261  |
| 887.7 | PI_16:1/22:2 | 6.948  | ± | 1.884  | 12.06 | ± | 1.778  | 10.11 | ± | 1.487  | 7.331 | ± | 0.9685 | 11.97 | ± | 1.505  | 13.14 | ± | 1.111  |
| 887.7 | PI_18:1/20:2 | 2.557  | ± | 1.195  | 12.79 | ± | 2.502  | 11.10 | ± | 2.955  | 5.006 | ± | 1.762  | 21.49 | ± | 1.716  | 16.99 | ± | 1.447  |
| 887.7 | PI_18:0/20:3 | 6.862  | ± | 0.7873 | 1.612 | ± | 1.050  | 5.301 | ± | 0.5300 | 10.61 | ± | 1.742  | 1.982 | ± | 0.8916 | 1.902 | ± | 1.241  |
| 889.7 | PI_16:1/22:1 | 178.4  | ± | 42.29  | 83.11 | ± | 16.41  | 104.2 | ± | 17.07  | 240.1 | ± | 54.31  | 177.1 | ± | 19.41  | 154.8 | ± | 8.307  |
| 889.7 | PI_16:0/22:2 | 6.773  | ± | 1.202  | 3.993 | ± | 0.8755 | 5.975 | ± | 1.464  | 8.804 | ± | 1.689  | 3.595 | ± | 1.176  | 4.881 | ± | 1.017  |
| 889.7 | PI_18:1/20:1 | 2.767  | ± | 1.251  | 18.42 | ± | 3.537  | 16.34 | ± | 4.376  | 6.196 | ± | 1.750  | 33.65 | ± | 4.319  | 23.26 | ± | 1.447  |
| 889.7 | PI_18:0/20:2 | 7.020  | ± | 0.6879 | 3.305 | ± | 1.069  | 0.748 | ± | 0.748  | 10.66 | ± | 2.026  | 4.135 | ± | 0.8724 | 4.182 | ± | 0.9236 |
| 891.7 | PI_16:1/22:0 | 33.17  | ± | 5.327  | 23.83 | ± | 4.015  | 23.03 | ± | 4.384  | 41.16 | ± | 6.380  | 39.14 | ± | 4.448  | 34.72 | ± | 2.742  |
| 891.7 | PI_16:0/22:1 | 280.8  | ± | 52.35  | 110.5 | ± | 9.270  | 159.1 | ± | 22.46  | 398.9 | ± | 46.86  | 122.8 | ± | 12.18  | 119.8 | ± | 4.829  |
| 891.7 | PI_18:1/20:0 | 67.56  | ± | 11.05  | 51.86 | ± | 5.253  | 60.88 | ± | 13.94  | 104.3 | ± | 16.64  | 95.06 | ± | 7.534  | 100.6 | ± | 4.552  |
| 891.7 | PI_18:0/20:1 | 12.65  | ± | 1.949  | 7.416 | ± | 1.012  | 6.198 | ± | 0.4065 | 18.87 | ± | 2.273  | 7.926 | ± | 0.6943 | 7.232 | ± | 0.7897 |
| 893.7 | PI_16:0/22:0 | 31.16  | ± | 5.835  | 21.43 | ± | 1.577  | 23.96 | ± | 3.218  | 43.16 | ± | 5.583  | 23.89 | ± | 2.897  | 23.11 | ± | 2.146  |
| 893.7 | PI_18:0/20:0 | 164.5  | ± | 23.60  | 56.48 | ± | 9.561  | 74.33 | ± | 9.662  | 209.1 | ± | 29.17  | 41.14 | ± | 3.758  | 47.81 | ± | 4.343  |
| 911.8 | PI_18:1/22:4 | 1.677  | ± | 1.066  | 18.37 | ± | 2.943  | 10.15 | ± | 2.529  | 3.856 | ± | 1.224  | 22.83 | ± | 3.833  | 23.34 | ± | 1.916  |
| 911.8 | PI_18:0/22:5 | 6.501  | ± | 0.7114 | 3.832 | ± | 1.296  | 4.084 | ± | 1.470  | 11.15 | ± | 1.915  | 3.560 | ± | 0.7428 | 3.399 | ± | 1.117  |
| 913.8 | PI_18:1/22:3 | B.Q.L. | ± | B.Q.L. | 14.56 | ± | 2.520  | 5.865 | ± | 2.317  | 3.014 | ± | 1.583  | 18.94 | ± | 2.625  | 16.41 | ± | 1.464  |
| 915.8 | PI_18:1/22:2 | 2.389  | ± | 1.069  | 9.642 | ± | 2.476  | 7.244 | ± | 0.5565 | 1.986 | ± | 1.293  | 14.43 | ± | 1.139  | 11.27 | ± | 1.207  |
| 917.8 | PI_18:1/22:1 | 99.96  | ± | 18.52  | 54.07 | ± | 8.563  | 82.60 | ± | 12.39  | 177.9 | ± | 28.84  | 141.0 | ± | 18.46  | 135.2 | ± | 5.260  |
| 412.3 | LPS_10:0     | 19.95  | ± | 13.62  | 17.99 | ± | 5.576  | 18.47 | ± | 5.294  | 20.37 | ± | 5.889  | 10.35 | ± | 3.742  | 13.65 | ± | 4.569  |
| 440.3 | LPS_12:0     | 75.77  | ± | 8.982  | 38.82 | ± | 9.719  | 59.66 | ± | 8.376  | 82.70 | ± | 18.67  | 28.77 | ± | 6.760  | 32.61 | ± | 11.40  |
| 468.3 | LPS_14:0     | 201.3  | ± | 36.31  | 209.4 | ± | 35.29  | 192.9 | ± | 59.66  | 259.2 | ± | 22.27  | 146.6 | ± | 25.93  | 199.5 | ± | 20.12  |
| 494.3 | LPS_16:1     | 1708   | ± | 347.2  | 1124  | ± | 206.3  | 1572  | ± | 367.2  | 1946  | ± | 265.5  | 1820  | ± | 191.1  | 2528  | ± | 152.8  |
| 496.3 | LPS_16:0     | 2152   | ± | 235.0  | 1452  | ± | 285.8  | 1476  | ± | 179.4  | 2577  | ± | 109.5  | 844.3 | ± | 65.68  | 1204  | ± | 89.91  |
| 520.4 | LPS_18:2     | 42.07  | ± | 6.694  | 47.77 | ± | 11.91  | 27.23 | ± | 5.074  | 40.46 | ± | 7.348  | 26.96 | ± | 6.040  | 20.42 | ± | 8.751  |
| 522.4 | LPS_18:1     | 1184   | ± | 167.6  | 1049  | ± | 159.1  | 1371  | ± | 375.4  | 1700  | ± | 173.2  | 1977  | ± | 261.1  | 2446  | ± | 201.8  |

|       |               |       |   |       |       |   |       |       |   |       |       |   |       |       |   |       |       |   |       |
|-------|---------------|-------|---|-------|-------|---|-------|-------|---|-------|-------|---|-------|-------|---|-------|-------|---|-------|
| 524.4 | LPS_18:0      | 2445  | ± | 204.3 | 1569  | ± | 333.4 | 1671  | ± | 182.5 | 3085  | ± | 199.5 | 918.7 | ± | 79.18 | 1196  | ± | 114.6 |
| 552.4 | LPS_20:0      | 41.19 | ± | 14.03 | 25.7  | ± | 10.70 | 35.08 | ± | 6.418 | 65.87 | ± | 10.31 | 27.87 | ± | 4.544 | 17.12 | ± | 4.517 |
| 650.5 | PS_12:0/14:0  | 358.3 | ± | 42.17 | 294.8 | ± | 47.09 | 164.2 | ± | 21.44 | 326.6 | ± | 44.00 | 155.4 | ± | 22.58 | 151.0 | ± | 19.75 |
| 730.6 | PS_14:0/18:2  | 124.7 | ± | 20.94 | 186.3 | ± | 23.39 | 143.1 | ± | 12.67 | 118.8 | ± | 23.09 | 156.4 | ± | 28.32 | 143.9 | ± | 27.11 |
| 730.6 | PS_16:1/16:1  | 2622  | ± | 415.5 | 8531  | ± | 1112  | 4258  | ± | 1267  | 4412  | ± | 942.6 | 5694  | ± | 834.8 | 5948  | ± | 569.1 |
| 732.6 | PS_14:0/18:1  | 321.1 | ± | 30.82 | 2202  | ± | 405.4 | 614.4 | ± | 106.7 | 307.5 | ± | 22.36 | 853.8 | ± | 149.9 | 633.8 | ± | 68.57 |
| 732.6 | PS_16:0/16:1  | 1018  | ± | 72.37 | 1949  | ± | 239.5 | 1192  | ± | 170.6 | 1202  | ± | 172.2 | 1234  | ± | 155.8 | 1222  | ± | 94.71 |
| 734.6 | PS_16:0/16:0  | 418.7 | ± | 27.64 | 385.5 | ± | 43.63 | 350.5 | ± | 59.22 | 615.8 | ± | 55.86 | 365.2 | ± | 48.53 | 427.3 | ± | 42.92 |
| 758.6 | PS_14:0/20:2  | 431.9 | ± | 64.70 | 122.9 | ± | 26.82 | 195.7 | ± | 24.40 | 291.4 | ± | 34.14 | 79.9  | ± | 12.17 | 107.1 | ± | 19.84 |
| 758.6 | PS_16:1/18:1  | 2074  | ± | 215.0 | 8222  | ± | 1069  | 5822  | ± | 1082  | 1561  | ± | 199.5 | 7462  | ± | 741.1 | 8276  | ± | 305.7 |
| 758.6 | PS_16:0/18:2  | 390.7 | ± | 29.25 | 653.0 | ± | 60.16 | 491.4 | ± | 78.03 | 421.3 | ± | 59.57 | 505.0 | ± | 59.41 | 506.2 | ± | 41.55 |
| 760.6 | PS_14:0/20:1  | 324.4 | ± | 100.8 | 166.4 | ± | 28.99 | 154.7 | ± | 25.53 | 278.0 | ± | 58.74 | 226.0 | ± | 42.51 | 230.7 | ± | 22.90 |
| 760.6 | PS_16:0/18:1  | 732.6 | ± | 40.22 | 1762  | ± | 204.2 | 1275  | ± | 183.2 | 667.7 | ± | 52.14 | 1519  | ± | 145.1 | 1558  | ± | 37.79 |
| 762.6 | PS_16:0/18:0  | 463.2 | ± | 19.38 | 1096  | ± | 164.2 | 734.9 | ± | 97.15 | 518.1 | ± | 32.45 | 2185  | ± | 190.3 | 2119  | ± | 173.7 |
| 776.6 | PS_a18:0/18:0 | 317.8 | ± | 42.65 | 589.7 | ± | 115.7 | 756.6 | ± | 59.45 | 278.8 | ± | 30.68 | 1421  | ± | 133.5 | 1225  | ± | 70.74 |
| 782.6 | PS_14:0/22:4  | 78.22 | ± | 14.32 | 78.18 | ± | 5.725 | 63.51 | ± | 13.61 | 67.18 | ± | 11.75 | 59.35 | ± | 6.688 | 35.80 | ± | 9.702 |
| 782.6 | PS_16:1/20:3  | 361.9 | ± | 33.80 | 1469  | ± | 298.3 | 875.6 | ± | 113.6 | 356.9 | ± | 39.12 | 1347  | ± | 189.2 | 1269  | ± | 86.89 |
| 782.6 | PS_16:0/20:4  | 249.3 | ± | 30.00 | 2041  | ± | 344.6 | 723.9 | ± | 255.6 | 229.1 | ± | 37.11 | 1542  | ± | 243.8 | 1434  | ± | 109.1 |
| 782.6 | PS_18:1/18:3  | 271.7 | ± | 63.81 | 7092  | ± | 1446  | 3091  | ± | 976.5 | 407.2 | ± | 60.93 | 6407  | ± | 980.1 | 5806  | ± | 374.0 |
| 784.6 | PS_14:0/22:3  | 112.3 | ± | 25.13 | 54.06 | ± | 9.570 | 64.31 | ± | 14.68 | 103.6 | ± | 14.10 | 40.11 | ± | 5.923 | 35.69 | ± | 4.813 |
| 784.6 | PS_16:1/20:2  | 652.8 | ± | 137.5 | 583.2 | ± | 65.07 | 499.5 | ± | 37.52 | 437.2 | ± | 90.97 | 480.6 | ± | 46.67 | 458.1 | ± | 37.57 |
| 784.6 | PS_16:0/20:3  | 124.2 | ± | 14.10 | 297.5 | ± | 71.40 | 148.1 | ± | 19.39 | 148.4 | ± | 16.84 | 245.5 | ± | 34.61 | 243.2 | ± | 19.61 |
| 784.6 | PS_18:1/18:2  | 302.8 | ± | 42.21 | 2273  | ± | 400.3 | 1484  | ± | 358.1 | 298.5 | ± | 48.33 | 2644  | ± | 318.8 | 2618  | ± | 102.1 |
| 786.6 | PS_16:1/20:1  | 862.2 | ± | 58.62 | 1952  | ± | 186.7 | 1971  | ± | 269.8 | 893.2 | ± | 121.9 | 1830  | ± | 214.7 | 2575  | ± | 224.1 |
| 786.6 | PS_16:0/20:2  | 131.6 | ± | 13.12 | 203.4 | ± | 27.44 | 147.2 | ± | 15.96 | 155.3 | ± | 28.59 | 490.7 | ± | 88.13 | 539.8 | ± | 39.40 |
| 786.6 | PS_18:0/18:2  | 363.7 | ± | 48.59 | 292.3 | ± | 32.77 | 209.2 | ± | 23.42 | 370.7 | ± | 25.01 | 349.7 | ± | 59.97 | 346.9 | ± | 43.01 |
| 786.6 | PS_18:1/18:1  | 792.5 | ± | 170.1 | 3571  | ± | 613.0 | 4146  | ± | 579.0 | 354.0 | ± | 40.59 | 4274  | ± | 528.0 | 5682  | ± | 530.6 |
| 788.6 | PS_16:0/20:1  | 273.8 | ± | 58.99 | 249.5 | ± | 15.76 | 268.5 | ± | 30.1  | 292.9 | ± | 35.08 | 223.9 | ± | 20.34 | 250.4 | ± | 10.53 |
| 788.6 | PS_18:0/18:1  | 683.6 | ± | 61.76 | 2190  | ± | 320.4 | 1669  | ± | 126.4 | 614.4 | ± | 72.43 | 2458  | ± | 183.5 | 2324  | ± | 147.2 |
| 790.6 | PS_18:0/18:0  | 501.9 | ± | 49.13 | 680.7 | ± | 57.48 | 430.7 | ± | 45.98 | 493.8 | ± | 76.16 | 854.7 | ± | 115.6 | 838.8 | ± | 65.47 |
| 810.7 | PS_18:0/20:4  | 194.9 | ± | 22.97 | 246.1 | ± | 33.00 | 148.7 | ± | 38.21 | 226.2 | ± | 14.37 | 278.8 | ± | 43.03 | 234.8 | ± | 27.12 |
| 812.7 | PS_16:0/22:3  | 173.8 | ± | 31.85 | 222.3 | ± | 21.55 | 174.3 | ± | 40.21 | 280.8 | ± | 41.63 | 162.0 | ± | 10.28 | 150.3 | ± | 15.25 |
| 812.7 | PS_18:1/20:2  | 149.6 | ± | 36.15 | 634.9 | ± | 70.66 | 425.2 | ± | 15.72 | 138.7 | ± | 30.98 | 654.8 | ± | 32.62 | 626.0 | ± | 53.21 |
| 814.7 | PS_18:1/20:1  | 256.5 | ± | 47.52 | 1563  | ± | 206.0 | 1423  | ± | 253.7 | 180.3 | ± | 33.17 | 1901  | ± | 142.5 | 2335  | ± | 185.6 |
| 814.7 | PS_18:2/20:0  | 109.8 | ± | 31.35 | 1452  | ± | 93.45 | 874.1 | ± | 83.03 | 84.27 | ± | 6.545 | 1149  | ± | 128.6 | 836.3 | ± | 32.97 |
| 816.7 | PS_18:0/20:1  | 229.6 | ± | 44.65 | 144.9 | ± | 15.21 | 153.3 | ± | 26.17 | 264.7 | ± | 36.97 | 154.4 | ± | 19.84 | 192.9 | ± | 28.49 |

|       |              |       |   |       |       |   |       |       |   |       |       |   |       |       |   |       |       |   |       |
|-------|--------------|-------|---|-------|-------|---|-------|-------|---|-------|-------|---|-------|-------|---|-------|-------|---|-------|
| 838.7 | PS_18:1/22:3 | 202.2 | ± | 25.96 | 1984  | ± | 230.6 | 1263  | ± | 331.4 | 260.5 | ± | 48.91 | 1807  | ± | 117.9 | 2282  | ± | 114.7 |
| 838.7 | PS_18:0/22:4 | 225.3 | ± | 46.29 | 188.1 | ± | 12.93 | 150.7 | ± | 30.14 | 246.0 | ± | 25.74 | 211.5 | ± | 52.64 | 163.4 | ± | 6.755 |
| 840.7 | PS_18:0/22:3 | 143.9 | ± | 27.60 | 110.5 | ± | 19.55 | 112.3 | ± | 13.79 | 197.3 | ± | 25.61 | 75.48 | ± | 10.52 | 109.2 | ± | 9.780 |

Supplementary Table 4: Concentrations (in pmol/mg protein) of cardiolipins (CL), and monolysocardiolipins (MLCL) in Aac2 and ArANT expressing yeast cells, Percoll-purified mitochondria and mitoplasts. N.D.: not determined. B.Q.L.: below quantitative limit. For CL determination, all the fragments that would comprise the acyl chains were summed up and isomeric composition for the molecular species as the brutto nomenclature (carbon:double bond) is given. Results shown are Mean +/- S.E.M.

| [M-2H] <sup>2-</sup> | Species  | Aac2       |       |              |       |            |       | Artemia-ANT |       |              |       |            |       |
|----------------------|----------|------------|-------|--------------|-------|------------|-------|-------------|-------|--------------|-------|------------|-------|
|                      |          | Yeast Cell |       | Mitochondria |       | Mitoplasts |       | Yeast Cell  |       | Mitochondria |       | Mitoplasts |       |
| 658.6                | CL_62:3  | 67.27 ±    | 12.96 | 932.0 ±      | 152.8 | 527.4 ±    | 55.40 | 59.28 ±     | 14.16 | 970.0 ±      | 77.64 | 708.1 ±    | 40.22 |
| 659.6                | CL_62:2  | 60.34 ±    | 17.26 | 961.9 ±      | 189.8 | 503.9 ±    | 52.99 | 51.84 ±     | 14.74 | 869.3 ±      | 69.11 | 659.2 ±    | 41.42 |
| 670.6                | CL_64:5  | 29.53 ±    | 7.773 | 59.29 ±      | 8.837 | 52.8 ±     | 24.87 | 30.92 ±     | 5.869 | 37.89 ±      | 7.084 | 32.91 ±    | 5.487 |
| 671.6                | CL_64:4  | 47.70 ±    | 9.157 | 796.6 ±      | 98.81 | 450.0 ±    | 11.98 | 44.79 ±     | 11.26 | 746.4 ±      | 54.25 | 521.7 ±    | 37.24 |
| 672.6                | CL_64:3  | 97.46 ±    | 15.36 | 1164 ±       | 209.4 | 640.3 ±    | 45.73 | 101.8 ±     | 29.00 | 1151 ±       | 79.14 | 890.1 ±    | 73.02 |
| 673.6                | CL_64:2  | 53.41 ±    | 7.607 | 674.6 ±      | 99.58 | 358.4 ±    | 31.85 | 47.95 ±     | 9.275 | 657.2 ±      | 54.07 | 493.5 ±    | 45.01 |
| 674.6                | CL_64:1  | 33.58 ±    | 5.852 | 178.3 ±      | 33.73 | 104.2 ±    | 11.94 | 46.49 ±     | 7.820 | 130.7 ±      | 10.76 | 101.5 ±    | 7.496 |
| 683.6                | CL_66:6  | 10.59 ±    | 3.024 | 52.20 ±      | 6.418 | 38.20 ±    | 6.699 | 20.01 ±     | 5.397 | 44.95 ±      | 3.705 | 25.50 ±    | 3.627 |
| 684.6                | CL_66:5  | 62.84 ±    | 9.208 | 153.1 ±      | 17.26 | 148.4 ±    | 24.79 | 48.15 ±     | 18.51 | 107.9 ±      | 15.13 | 88.06 ±    | 13.54 |
| 685.6                | CL_66:4  | 224.8 ±    | 36.47 | 3747 ±       | 643.3 | 1837 ±     | 152.2 | 172.0 ±     | 45.56 | 4193 ±       | 324.8 | 2834 ±     | 216.6 |
| 686.6                | CL_66:3  | 235.8 ±    | 42.47 | 6074 ±       | 2717  | 1373 ±     | 94.30 | 183.8 ±     | 46.55 | 2528 ±       | 192.8 | 5110 ±     | 3220  |
| 687.6                | CL_66:2  | 97.02 ±    | 22.44 | 1035 ±       | 169.5 | 548.9 ±    | 43.93 | 98.90 ±     | 27.15 | 935.6 ±      | 88.34 | 716.8 ±    | 69.26 |
| 688.6                | CL_66:1  | 50.61 ±    | 5.433 | 168.2 ±      | 19.43 | 130.8 ±    | 11.93 | 55.35 ±     | 10.92 | 162.6 ±      | 22.36 | 138.7 ±    | 11.70 |
| 695.6                | CL_68:8  | 14.33 ±    | 2.418 | 19.33 ±      | 4.957 | 25.59 ±    | 6.068 | 23.89 ±     | 6.669 | 26.96 ±      | 5.383 | 23.60 ±    | 5.045 |
| 696.6                | CL_68:7  | 33.12 ±    | 5.003 | 66.45 ±      | 6.172 | 61.54 ±    | 10.52 | 47.83 ±     | 9.368 | 44.37 ±      | 5.345 | 35.66 ±    | 7.317 |
| 697.6                | CL_68:6  | 23.23 ±    | 4.696 | 197.1 ±      | 14.08 | 113.9 ±    | 10.07 | 23.43 ±     | 3.038 | 92.01 ±      | 19.75 | 102.6 ±    | 13.05 |
| 698.6                | CL_68:5  | 55.24 ±    | 6.787 | 522.8 ±      | 50.14 | 304.7 ±    | 22.58 | 63.82 ±     | 13.66 | 374.5 ±      | 26.22 | 335.2 ±    | 22.17 |
| 699.6                | CL_68:4  | 533.6 ±    | 87.31 | 7669 ±       | 1591  | 3849 ±     | 450.2 | 430.9 ±     | 101.5 | 10370 ±      | 903.8 | 7227 ±     | 661.7 |
| 700.7                | CL_68:3  | 463.4 ±    | 61.28 | 5662 ±       | 1072  | 2767 ±     | 317.9 | 415.0 ±     | 99.62 | 6309 ±       | 681.0 | 4469 ±     | 367.7 |
| 701.7                | CL_68:2  | 195.8 ±    | 30.32 | 1746 ±       | 349.8 | 1002 ±     | 135.5 | 160.5 ±     | 33.40 | 1915 ±       | 229.8 | 1406 ±     | 126.6 |
| 702.7                | CL_68:1  | 145.4 ±    | 26.19 | 280.8 ±      | 44.39 | 202.8 ±    | 26.18 | 119.3 ±     | 33.23 | 276.4 ±      | 22.50 | 258.1 ±    | 21.69 |
| 703.7                | CL_68:0  | 33.74 ±    | 3.350 | 37.88 ±      | 7.097 | 44.95 ±    | 11.88 | 32.51 ±     | 7.440 | 43.06 ±      | 9.197 | 34.18 ±    | 6.146 |
| 704.7                | CL_70:13 | 26.72 ±    | 5.105 | 26.58 ±      | 5.865 | 37.96 ±    | 12.87 | 39.16 ±     | 16.07 | 20.72 ±      | 5.884 | 16.50 ±    | 4.300 |
| 706.7                | CL_70:11 | 27.15 ±    | 2.925 | 45.71 ±      | 7.852 | 48.71 ±    | 10.54 | 40.85 ±     | 7.676 | 37.11 ±      | 4.851 | 29.01 ±    | 5.771 |
| 707.7                | CL_70:10 | 11.56 ±    | 2.195 | 32.64 ±      | 8.732 | 21.85 ±    | 3.155 | 20.92 ±     | 6.116 | 27.48 ±      | 8.159 | 31.03 ±    | 4.947 |
| 708.7                | CL_70:9  | 39.59 ±    | 9.493 | 37.37 ±      | 6.948 | 45.90 ±    | 12.36 | 42.15 ±     | 9.854 | 29.00 ±      | 2.785 | 32.07 ±    | 7.412 |
| 709.7                | CL_70:8  | 17.27 ±    | 2.808 | 63.64 ±      | 5.444 | 38.16 ±    | 4.375 | 16.73 ±     | 4.097 | 40.48 ±      | 6.942 | 31.84 ±    | 3.814 |
| 710.7                | CL_70:7  | 31.91 ±    | 5.564 | 93.66 ±      | 14.76 | 48.39 ±    | 9.195 | 46.40 ±     | 9.255 | 37.08 ±      | 8.187 | 39.72 ±    | 5.760 |
| 711.7                | CL_70:6  | 27.82 ±    | 3.778 | 248.3 ±      | 27.42 | 134.7 ±    | 11.60 | 37.24 ±     | 7.753 | 136.4 ±      | 26.85 | 97.02 ±    | 11.08 |
| 712.7                | CL_70:5  | 76.76 ±    | 11.03 | 567.7 ±      | 82.67 | 308.1 ±    | 14.67 | 72.79 ±     | 15.42 | 512.9 ±      | 48.89 | 373.2 ±    | 43.61 |



|       |          |       |   |       |       |   |       |       |   |       |       |   |       |       |   |       |       |   |       |
|-------|----------|-------|---|-------|-------|---|-------|-------|---|-------|-------|---|-------|-------|---|-------|-------|---|-------|
| 713.7 | CL_70:4  | 473.9 | ± | 82.03 | 5447  | ± | 1146  | 2844  | ± | 453.3 | 432.2 | ± | 90.16 | 8606  | ± | 851.5 | 5973  | ± | 619.4 |
| 714.7 | CL_70:3  | 335.7 | ± | 48.64 | 4700  | ± | 2634  | 1515  | ± | 248.0 | 328.2 | ± | 55.55 | 3043  | ± | 311.9 | 6627  | ± | 4152  |
| 715.7 | CL_70:2  | 129.6 | ± | 11.77 | 683.4 | ± | 116.4 | 414.5 | ± | 64.90 | 117.1 | ± | 20.12 | 927.3 | ± | 113.4 | 697.4 | ± | 61.38 |
| 716.7 | CL_70:1  | 92.37 | ± | 9.467 | 154.6 | ± | 20.39 | 188.7 | ± | 32.74 | 106.4 | ± | 16.79 | 223.8 | ± | 20.46 | 184.7 | ± | 17.55 |
| 717.7 | CL_70:0  | 48.67 | ± | 4.499 | 75.24 | ± | 8.738 | 82.30 | ± | 16.03 | 47.85 | ± | 6.607 | 88.02 | ± | 9.156 | 75.39 | ± | 13.00 |
| 719.7 | CL_72:12 | 13.20 | ± | 2.621 | 40.49 | ± | 4.233 | 26.95 | ± | 4.885 | 29.66 | ± | 7.608 | 28.24 | ± | 6.455 | 32.41 | ± | 8.167 |
| 720.7 | CL_72:11 | 34.72 | ± | 5.639 | 50.56 | ± | 8.711 | 45.08 | ± | 10.07 | 43.45 | ± | 10.40 | 37.98 | ± | 4.005 | 36.22 | ± | 6.545 |
| 721.7 | CL_72:10 | 15.61 | ± | 2.757 | 27.29 | ± | 4.046 | 34.29 | ± | 13.81 | 23.88 | ± | 6.187 | 36.96 | ± | 6.432 | 23.64 | ± | 4.264 |
| 722.7 | CL_72:9  | 29.10 | ± | 5.001 | 53.81 | ± | 5.419 | 67.16 | ± | 17.92 | 46.92 | ± | 9.005 | 43.84 | ± | 11.30 | 37.33 | ± | 4.578 |
| 723.7 | CL_72:8  | 18.38 | ± | 1.676 | 81.29 | ± | 10.03 | 51.3  | ± | 7.194 | 22.78 | ± | 3.144 | 55.29 | ± | 7.150 | 34.98 | ± | 5.615 |
| 724.7 | CL_72:7  | 30.25 | ± | 4.377 | 111.3 | ± | 12.40 | 85.63 | ± | 8.863 | 45.50 | ± | 8.307 | 74.71 | ± | 7.869 | 62.50 | ± | 10.44 |
| 725.7 | CL_72:6  | 23.38 | ± | 3.565 | 146.3 | ± | 22.51 | 92.64 | ± | 7.860 | 27.04 | ± | 9.526 | 140.7 | ± | 13.61 | 118.4 | ± | 15.26 |
| 726.7 | CL_72:5  | 52.70 | ± | 5.822 | 222.8 | ± | 23.79 | 123.2 | ± | 13.09 | 54.01 | ± | 12.23 | 102.3 | ± | 15.66 | 103.4 | ± | 8.182 |
| 727.7 | CL_72:4  | 146.1 | ± | 22.53 | 1344  | ± | 289.9 | 733.5 | ± | 144.1 | 153.6 | ± | 31.02 | 1628  | ± | 180.2 | 1243  | ± | 114.7 |
| 728.7 | CL_72:3  | 88.33 | ± | 15.24 | 541.0 | ± | 105.1 | 318.1 | ± | 60.57 | 109.5 | ± | 18.05 | 870.5 | ± | 102.0 | 590.8 | ± | 53.08 |
| 729.7 | CL_72:2  | 24.02 | ± | 3.221 | 116.1 | ± | 18.02 | 84.63 | ± | 17.70 | 36.54 | ± | 9.047 | 154.6 | ± | 10.59 | 130.9 | ± | 14.49 |
| 730.7 | CL_72:1  | 39.84 | ± | 7.170 | 59.74 | ± | 8.283 | 60.44 | ± | 10.55 | 60.73 | ± | 12.14 | 51.18 | ± | 8.939 | 40.78 | ± | 4.265 |
| 731.7 | CL_72:0  | 17.70 | ± | 1.932 | 18.32 | ± | 3.165 | 21.57 | ± | 5.773 | 21.04 | ± | 4.434 | 22.19 | ± | 6.333 | 23.72 | ± | 5.243 |
| 732.7 | CL_74:13 | 24.50 | ± | 4.775 | 25.11 | ± | 2.251 | 27.85 | ± | 7.232 | 35.89 | ± | 8.835 | 24.43 | ± | 4.153 | 22.32 | ± | 4.032 |
| 734.7 | CL_74:11 | 35.35 | ± | 11.92 | 27.86 | ± | 5.514 | 30.30 | ± | 7.381 | 50.43 | ± | 13.15 | 19.55 | ± | 4.914 | 22.19 | ± | 4.156 |
| 735.7 | CL_74:10 | 15.52 | ± | 2.295 | 19.42 | ± | 3.111 | 24.11 | ± | 6.646 | 18.86 | ± | 3.454 | 22.75 | ± | 6.698 | 17.87 | ± | 3.449 |
| 736.7 | CL_74:9  | 38.32 | ± | 7.312 | 32.02 | ± | 5.353 | 40.98 | ± | 12.06 | 51.46 | ± | 14.01 | 32.31 | ± | 3.707 | 32.88 | ± | 4.391 |
| 737.7 | CL_74:8  | 19.56 | ± | 6.336 | 36.08 | ± | 9.203 | 28.26 | ± | 6.922 | 30.69 | ± | 4.979 | 34.71 | ± | 6.104 | 30.70 | ± | 5.039 |
| 738.7 | CL_74:7  | 28.02 | ± | 3.141 | 44.57 | ± | 6.337 | 48.13 | ± | 9.480 | 51.38 | ± | 10.03 | 28.35 | ± | 9.791 | 25.91 | ± | 3.136 |
| 739.7 | CL_74:6  | 16.58 | ± | 1.866 | 23.91 | ± | 9.598 | 26.85 | ± | 6.334 | 23.57 | ± | 5.183 | 17.91 | ± | 5.240 | 23.75 | ± | 3.546 |
| 740.7 | CL_74:5  | 22.89 | ± | 4.052 | 29.48 | ± | 9.847 | 36.50 | ± | 10.89 | 44.48 | ± | 7.479 | 26.39 | ± | 2.836 | 25.58 | ± | 6.905 |
| 741.7 | CL_74:4  | 16.87 | ± | 4.239 | 22.70 | ± | 5.579 | 21.93 | ± | 7.072 | 24.72 | ± | 4.794 | 31.15 | ± | 6.888 | 21.84 | ± | 3.465 |
| 742.7 | CL_74:3  | 36.29 | ± | 3.654 | 39.97 | ± | 6.649 | 59.59 | ± | 17.02 | 49.23 | ± | 9.948 | 38.03 | ± | 6.926 | 32.90 | ± | 6.793 |
| 743.7 | CL_74:2  | 14.70 | ± | 2.609 | 27.70 | ± | 3.074 | 23.59 | ± | 8.587 | 24.64 | ± | 4.215 | 33.91 | ± | 5.156 | 25.10 | ± | 3.416 |
| 743.7 | CL_74:1  | 18.90 | ± | 1.963 | 27.27 | ± | 1.848 | 31.34 | ± | 10.72 | 23.12 | ± | 4.613 | 31.82 | ± | 7.352 | 31.83 | ± | 8.572 |
| 744.7 | CL_76:15 | 25.53 | ± | 2.265 | 35.82 | ± | 4.885 | 43.73 | ± | 11.59 | 38.00 | ± | 7.149 | 33.93 | ± | 6.649 | 35.11 | ± | 3.529 |
| 745.7 | CL_76:14 | 14.36 | ± | 2.458 | 26.35 | ± | 4.744 | 30.05 | ± | 4.715 | 19.37 | ± | 3.881 | 40.76 | ± | 10.58 | 34.37 | ± | 7.619 |
| 746.7 | CL_76:13 | 27.89 | ± | 5.408 | 40.04 | ± | 9.455 | 24.41 | ± | 11.78 | 41.85 | ± | 8.716 | 31.49 | ± | 13.87 | 26.17 | ± | 13.65 |
| 748.7 | CL_76:11 | 23.46 | ± | 2.730 | 20.48 | ± | 6.546 | 23.74 | ± | 9.140 | 37.48 | ± | 9.584 | 8.916 | ± | 4.266 | 10.01 | ± | 3.711 |
| 750.7 | CL_76:9  | 50.07 | ± | 10.60 | 32.02 | ± | 9.829 | 27.52 | ± | 5.514 | 49.92 | ± | 13.53 | 23.25 | ± | 2.837 | 22.09 | ± | 2.829 |
| 751.7 | CL_76:8  | 18.46 | ± | 2.976 | 15.44 | ± | 3.887 | 24.06 | ± | 6.470 | 22.60 | ± | 3.894 | 22.94 | ± | 3.432 | 21.19 | ± | 5.182 |

|       |          |       |   |       |       |   |       |       |   |       |       |   |       |       |   |       |       |   |       |
|-------|----------|-------|---|-------|-------|---|-------|-------|---|-------|-------|---|-------|-------|---|-------|-------|---|-------|
| 752.7 | CL_76:7  | 30.61 | ± | 4.547 | 33.80 | ± | 11.77 | 31.97 | ± | 7.15  | 51.22 | ± | 10.97 | 34.95 | ± | 5.54  | 26.22 | ± | 3.635 |
| 753.7 | CL_76:6  | 14.63 | ± | 1.469 | 22.30 | ± | 3.671 | 13.51 | ± | 4.312 | 26.33 | ± | 6.868 | 13.48 | ± | 4.012 | 19.81 | ± | 4.204 |
| 754.7 | CL_76:5  | 32.49 | ± | 4.766 | 39.08 | ± | 5.392 | 43.98 | ± | 9.939 | 47.86 | ± | 12.54 | 28.25 | ± | 6.704 | 33.99 | ± | 8.382 |
| 755.7 | CL_76:4  | 16.71 | ± | 3.309 | 22.80 | ± | 5.542 | 27.35 | ± | 7.082 | 27.41 | ± | 6.046 | 16.80 | ± | 4.606 | 20.68 | ± | 5.676 |
| 756.7 | CL_76:3  | 19.20 | ± | 1.662 | 32.63 | ± | 10.30 | 35.27 | ± | 8.869 | 33.62 | ± | 5.342 | 24.39 | ± | 5.749 | 21.90 | ± | 6.948 |
| 757.7 | CL_76:2  | 12.96 | ± | 2.558 | 20.29 | ± | 2.747 | 20.28 | ± | 6.098 | 21.11 | ± | 3.845 | 29.33 | ± | 3.867 | 23.75 | ± | 3.407 |
| 758.7 | CL_78:15 | 29.81 | ± | 2.453 | 20.93 | ± | 2.815 | 50.05 | ± | 14.58 | 39.71 | ± | 8.957 | 27.49 | ± | 6.543 | 37.17 | ± | 7.959 |
| 759.7 | CL_78:14 | 14.67 | ± | 2.323 | 19.66 | ± | 5.099 | 26.42 | ± | 7.354 | 22.62 | ± | 4.630 | 15.70 | ± | 2.445 | 14.96 | ± | 3.549 |
| 760.7 | CL_78:13 | 29.94 | ± | 6.010 | 35.92 | ± | 3.745 | 40.32 | ± | 11.59 | 51.26 | ± | 10.38 | 29.14 | ± | 4.194 | 32.01 | ± | 3.986 |
| 761.7 | CL_78:12 | 14.97 | ± | 2.549 | 29.11 | ± | 8.614 | 21.40 | ± | 6.417 | 26.83 | ± | 4.615 | 28.25 | ± | 3.080 | 26.00 | ± | 5.070 |
| 762.7 | CL_78:11 | 33.47 | ± | 4.924 | 32.54 | ± | 7.652 | 24.75 | ± | 7.130 | 46.73 | ± | 8.459 | 10.31 | ± | 4.695 | 11.64 | ± | 2.202 |
| 763.7 | CL_78:10 | 17.58 | ± | 3.562 | 20.77 | ± | 4.255 | 18.73 | ± | 5.051 | 22.75 | ± | 4.868 | 21.84 | ± | 5.080 | 15.65 | ± | 2.272 |
| 764.7 | CL_78:9  | 20.50 | ± | 2.124 | 22.79 | ± | 6.674 | 41.54 | ± | 12.20 | 39.61 | ± | 7.846 | 28.93 | ± | 4.503 | 28.69 | ± | 8.267 |
| 766.7 | CL_78:7  | 27.63 | ± | 2.025 | 36.36 | ± | 8.885 | 33.15 | ± | 8.752 | 43.28 | ± | 8.011 | 22.56 | ± | 5.010 | 36.97 | ± | 5.278 |
| 767.7 | CL_78:6  | 15.70 | ± | 1.636 | 21.78 | ± | 6.859 | 30.63 | ± | 9.031 | 36.09 | ± | 8.635 | 14.67 | ± | 3.970 | 30.35 | ± | 2.269 |
| 768.7 | CL_78:5  | 36.33 | ± | 6.570 | 28.05 | ± | 11.41 | 29.72 | ± | 10.55 | 36.29 | ± | 14.17 | 19.05 | ± | 3.408 | 13.84 | ± | 5.176 |
| 770.7 | CL_80:17 | 24.06 | ± | 4.535 | 26.97 | ± | 7.859 | 34.97 | ± | 10.40 | 36.63 | ± | 7.475 | 11.53 | ± | 1.319 | 12.79 | ± | 1.636 |
| 771.7 | CL_80:16 | 15.35 | ± | 1.054 | 18.32 | ± | 3.048 | 17.47 | ± | 4.826 | 18.50 | ± | 4.655 | 27.28 | ± | 4.623 | 12.31 | ± | 3.023 |
| 772.7 | CL_80:15 | 46.18 | ± | 9.348 | 34.30 | ± | 7.173 | 47.78 | ± | 8.931 | 43.58 | ± | 8.947 | 39.07 | ± | 5.132 | 40.52 | ± | 3.490 |
| 773.7 | CL_80:14 | 21.07 | ± | 2.542 | 38.00 | ± | 7.310 | 36.47 | ± | 7.144 | 27.97 | ± | 5.209 | 38.04 | ± | 5.874 | 39.02 | ± | 5.223 |
| 774.7 | CL_80:13 | 56.77 | ± | 3.927 | 64.12 | ± | 17.71 | 76.81 | ± | 18.49 | 61.92 | ± | 9.368 | 33.33 | ± | 16.16 | 33.49 | ± | 10.07 |
| 775.7 | CL_80:12 | 34.68 | ± | 4.693 | 48.83 | ± | 14.40 | 62.88 | ± | 10.31 | 46.60 | ± | 6.630 | 25.88 | ± | 9.105 | 23.49 | ± | 4.017 |
| 776.7 | CL_80:11 | 56.48 | ± | 7.460 | 68.22 | ± | 20.53 | 70.78 | ± | 11.39 | 60.19 | ± | 8.205 | 22.17 | ± | 4.879 | 21.98 | ± | 3.941 |
| 777.7 | CL_80:10 | 25.58 | ± | 2.589 | 42.77 | ± | 13.07 | 39.19 | ± | 16.37 | 28.54 | ± | 5.716 | 10.56 | ± | 4.564 | 18.86 | ± | 3.100 |
| 780.7 | CL_80:7  | 48.82 | ± | 7.204 | 35.35 | ± | 6.716 | 50.47 | ± | 18.14 | 49.60 | ± | 13.33 | 38.52 | ± | 8.858 | 35.44 | ± | 2.947 |
| 781.7 | CL_80:6  | 23.08 | ± | 3.830 | 23.33 | ± | 4.966 | 38.04 | ± | 11.39 | 34.00 | ± | 10.75 | 27.79 | ± | 7.665 | 28.35 | ± | 4.061 |
| 782.7 | CL_80:5  | 24.07 | ± | 3.315 | 35.83 | ± | 6.344 | 34.96 | ± | 5.884 | 49.55 | ± | 9.038 | 32.20 | ± | 5.910 | 41.37 | ± | 6.322 |
| 784.7 | CL_82:17 | 44.35 | ± | 12.85 | 22.35 | ± | 5.028 | 34.97 | ± | 4.962 | 41.08 | ± | 10.38 | 18.34 | ± | 7.231 | 23.74 | ± | 4.376 |
| 786.7 | CL_82:15 | 26.53 | ± | 4.325 | 42.31 | ± | 15.59 | 29.83 | ± | 6.638 | 49.84 | ± | 9.059 | 22.77 | ± | 6.537 | 35.49 | ± | 8.951 |
| 788.7 | CL_82:13 | 25.83 | ± | 4.079 | 39.79 | ± | 8.589 | 35.39 | ± | 6.900 | 51.77 | ± | 12.61 | 44.81 | ± | 8.121 | 40.81 | ± | 5.957 |
| 789.7 | CL_82:12 | 19.91 | ± | 2.621 | 33.83 | ± | 10.39 | 40.49 | ± | 8.240 | 36.40 | ± | 7.607 | 48.91 | ± | 7.208 | 39.86 | ± | 11.41 |
| 790.7 | CL_82:11 | 94.44 | ± | 21.28 | 72.97 | ± | 10.76 | 102.1 | ± | 21.65 | 72.55 | ± | 15.30 | 67.13 | ± | 10.92 | 53.40 | ± | 6.846 |
| 792.7 | CL_82:9  | 25.91 | ± | 4.507 | 23.85 | ± | 3.452 | 31.7  | ± | 7.924 | 35.15 | ± | 6.987 | 22.99 | ± | 4.185 | 20.29 | ± | 6.175 |
| 794.7 | CL_84:21 | 37.11 | ± | 5.591 | 38.81 | ± | 4.224 | 44.66 | ± | 10.55 | 43.83 | ± | 7.096 | 31.13 | ± | 7.690 | 27.30 | ± | 6.167 |
| 795.7 | CL_84:20 | 13.89 | ± | 3.256 | 29.20 | ± | 5.101 | 20.40 | ± | 3.583 | 16.51 | ± | 2.853 | 20.46 | ± | 6.182 | 28.14 | ± | 6.609 |
| 796.7 | CL_84:19 | 32.33 | ± | 7.975 | 34.22 | ± | 9.388 | 37.56 | ± | 10.40 | 40.61 | ± | 6.456 | 37.79 | ± | 6.473 | 30.91 | ± | 4.790 |

|       |           |       |   |       |       |   |       |       |   |       |       |   |       |       |   |       |       |   |       |
|-------|-----------|-------|---|-------|-------|---|-------|-------|---|-------|-------|---|-------|-------|---|-------|-------|---|-------|
| 797.7 | CL_84:18  | 14.19 | ± | 2.562 | 19.01 | ± | 4.341 | 28.62 | ± | 8.835 | 23.04 | ± | 5.2   | 28.66 | ± | 2.743 | 27.57 | ± | 5.171 |
| 798.7 | CL_84:17  | 23.36 | ± | 1.638 | 30.71 | ± | 5.401 | 38.16 | ± | 9.429 | 49.32 | ± | 12.1  | 29.35 | ± | 2.638 | 23.82 | ± | 5.321 |
| 799.7 | CL_84:16  | 14.11 | ± | 3.023 | 17.49 | ± | 4.213 | 24.41 | ± | 6.948 | 23.89 | ± | 4.924 | 18.21 | ± | 4.572 | 23.12 | ± | 4.813 |
| 800.7 | CL_84:15  | 28.76 | ± | 3.389 | 21.08 | ± | 4.957 | 36.18 | ± | 8.815 | 42.17 | ± | 10.16 | 14.34 | ± | 2.360 | 26.58 | ± | 4.742 |
| 801.7 | CL_84:14  | 14.81 | ± | 3.382 | 18.69 | ± | 3.456 | 28.06 | ± | 7.917 | 31.16 | ± | 6.009 | 12.51 | ± | 2.783 | 16.38 | ± | 4.854 |
| 802.7 | CL_84:13  | 29.18 | ± | 4.994 | 29.77 | ± | 9.815 | 37.09 | ± | 11.81 | 48.00 | ± | 10.84 | 22.22 | ± | 5.177 | 35.50 | ± | 7.604 |
| 803.7 | CL_84:12  | 15.90 | ± | 2.662 | 24.45 | ± | 6.048 | 21.19 | ± | 6.303 | 22.98 | ± | 7.124 | 24.20 | ± | 4.574 | 20.92 | ± | 4.636 |
| 804.7 | CL_84:11  | 29.40 | ± | 2.916 | 40.73 | ± | 3.576 | 55.37 | ± | 12.07 | 47.49 | ± | 10.01 | 38.71 | ± | 5.893 | 36.00 | ± | 4.756 |
| 805.7 | CL_84:10  | 23.56 | ± | 3.865 | 32.79 | ± | 3.715 | 42.63 | ± | 8.738 | 39.13 | ± | 6.876 | 27.62 | ± | 4.191 | 38.53 | ± | 8.088 |
| 806.7 | CL_84:9   | 44.86 | ± | 4.534 | 48.57 | ± | 14.01 | 68.25 | ± | 17.15 | 59.87 | ± | 9.635 | 47.73 | ± | 5.969 | 47.35 | ± | 6.439 |
| 808.7 | CL_86:21  | 36.36 | ± | 8.786 | 20.93 | ± | 3.904 | 38.22 | ± | 11.20 | 38.52 | ± | 8.477 | 30.60 | ± | 6.455 | 20.57 | ± | 5.919 |
| 810.7 | CL_86:19  | 28.66 | ± | 3.463 | 36.15 | ± | 10.24 | 37.04 | ± | 7.523 | 45.79 | ± | 6.476 | 24.03 | ± | 6.757 | 30.26 | ± | 5.044 |
| 812.7 | CL_86:17  | 26.62 | ± | 5.428 | 27.84 | ± | 9.453 | 23.31 | ± | 4.722 | 40.44 | ± | 6.39  | 20.14 | ± | 5.361 | 34.05 | ± | 2.538 |
| 814.7 | CL_86:15  | 27.23 | ± | 3.864 | 17.63 | ± | 5.886 | 30.55 | ± | 7.034 | 37.01 | ± | 6.221 | 30.57 | ± | 5.498 | 25.68 | ± | 4.582 |
| 815.7 | CL_86:14  | 11.25 | ± | 2.286 | 25.87 | ± | 4.028 | 29.49 | ± | 5.670 | 19.49 | ± | 3.903 | 22.09 | ± | 5.524 | 23.94 | ± | 5.946 |
| 816.7 | CL_86:13  | 31.39 | ± | 3.455 | 31.73 | ± | 10.57 | 35.96 | ± | 10.85 | 39.96 | ± | 8.458 | 30.18 | ± | 3.848 | 21.79 | ± | 3.358 |
| 817.7 | CL_86:12  | 15.75 | ± | 2.676 | 26.54 | ± | 2.642 | 25.03 | ± | 4.903 | 27.76 | ± | 6.796 | 29.62 | ± | 4.325 | 16.97 | ± | 2.764 |
| 818.7 | CL_86:11  | 27.46 | ± | 4.686 | 37.18 | ± | 7.482 | 44.93 | ± | 12.41 | 53.86 | ± | 11.97 | 33.37 | ± | 4.254 | 41.18 | ± | 5.748 |
| 819.7 | CL_88:24  | 13.34 | ± | 2.877 | 17.65 | ± | 3.415 | 22.51 | ± | 6.083 | 20.9  | ± | 4.864 | 20.02 | ± | 3.047 | 15.37 | ± | 6.532 |
| 820.7 | CL_88:23  | 20.14 | ± | 3.309 | 28.81 | ± | 4.263 | 31.79 | ± | 6.431 | 39.56 | ± | 6.728 | 22.66 | ± | 8.912 | 27.20 | ± | 5.140 |
| 821.7 | CL_88:22  | 16.16 | ± | 3.054 | 21.85 | ± | 8.44  | 19.54 | ± | 5.442 | 25.00 | ± | 4.124 | 14.48 | ± | 5.403 | 23.62 | ± | 4.138 |
| 822.7 | CL_88:21  | 21.49 | ± | 3.056 | 31.86 | ± | 7.818 | 33.62 | ± | 7.899 | 33.32 | ± | 6.687 | 34.27 | ± | 4.951 | 29.83 | ± | 7.842 |
| 824.7 | CL_88:19  | 28.80 | ± | 3.755 | 27.25 | ± | 7.975 | 23.40 | ± | 6.270 | 40.15 | ± | 8.767 | 19.22 | ± | 2.900 | 29.62 | ± | 11.59 |
| 825.7 | CL_88:18  | 17.18 | ± | 4.091 | 15.16 | ± | 2.634 | 13.15 | ± | 3.630 | 20.08 | ± | 5.631 | 19.17 | ± | 5.807 | 28.06 | ± | 4.962 |
| 826.7 | CL_88:17  | 23.81 | ± | 3.576 | 25.92 | ± | 7.073 | 21.16 | ± | 5.183 | 42.63 | ± | 8.102 | 20.51 | ± | 2.879 | 32.19 | ± | 5.851 |
| 827.7 | CL_88:16  | 9.190 | ± | 2.134 | 20.83 | ± | 6.651 | 19.57 | ± | 5.339 | 29.16 | ± | 6.613 | 16.86 | ± | 4.557 | 21.55 | ± | 2.689 |
| 832.7 | CL_90:25  | 31.17 | ± | 5.866 | 30.73 | ± | 7.599 | 31.11 | ± | 10.45 | 39.32 | ± | 10.22 | 24.58 | ± | 4.896 | 46.84 | ± | 7.403 |
| 580.6 | MLCL_52:4 | 9.642 | ± | 2.424 | 41.32 | ± | 6.500 | 21.72 | ± | 6.665 | 20.28 | ± | 4.165 | 24.55 | ± | 4.086 | 32.84 | ± | 4.861 |
| 581.6 | MLCL_52:3 | 25.67 | ± | 4.857 | 471.3 | ± | 102.0 | 283.5 | ± | 43.10 | 24.40 | ± | 5.63  | 619.2 | ± | 33.77 | 449.3 | ± | 30.01 |
| 582.6 | MLCL_52:2 | 26.49 | ± | 4.555 | 294.0 | ± | 68.28 | 156.7 | ± | 13.88 | 29.43 | ± | 6.799 | 352.9 | ± | 29.57 | 223.1 | ± | 14.65 |
| 592.6 | MLCL_54:6 | 16.40 | ± | 2.232 | 29.92 | ± | 4.115 | 29.46 | ± | 4.957 | 28.34 | ± | 5.198 | 20.37 | ± | 4.796 | 21.56 | ± | 3.894 |
| 593.6 | MLCL_54:5 | 25.49 | ± | 2.793 | 39.32 | ± | 6.630 | 44.81 | ± | 6.467 | 25.98 | ± | 3.654 | 46.91 | ± | 12.29 | 26.90 | ± | 5.209 |
| 594.6 | MLCL_54:4 | 37.15 | ± | 5.244 | 28.96 | ± | 10.52 | 35.97 | ± | 9.544 | 50.57 | ± | 11.45 | 31.71 | ± | 7.039 | 35.19 | ± | 6.976 |
| 595.6 | MLCL_54:3 | 25.60 | ± | 2.041 | 202.7 | ± | 48.11 | 119.0 | ± | 24.74 | 22.65 | ± | 4.261 | 297.3 | ± | 17.60 | 220.0 | ± | 14.07 |
| 596.6 | MLCL_54:2 | 14.50 | ± | 2.732 | 68.99 | ± | 14.53 | 50.89 | ± | 7.221 | 16.13 | ± | 4.265 | 86.44 | ± | 12.57 | 64.38 | ± | 6.632 |
| 608.6 | MLCL_56:4 | 17.02 | ± | 1.178 | 20.05 | ± | 3.297 | 29.30 | ± | 8.220 | 19.39 | ± | 4.149 | 18.20 | ± | 4.242 | 15.45 | ± | 3.518 |

|       |            |       |   |       |       |   |       |       |   |       |       |   |       |       |   |       |       |   |       |
|-------|------------|-------|---|-------|-------|---|-------|-------|---|-------|-------|---|-------|-------|---|-------|-------|---|-------|
| 616.6 | MLCL_58:10 | 24.70 | ± | 4.022 | 39.9  | ± | 8.093 | 43.19 | ± | 10.56 | 38.89 | ± | 4.479 | 34.86 | ± | 8.045 | 30.61 | ± | 4.854 |
| 617.6 | MLCL_58:9  | 9.223 | ± | 1.707 | 19.99 | ± | 2.188 | 19.72 | ± | 3.575 | 15.72 | ± | 3.387 | 16.88 | ± | 2.937 | 9.097 | ± | 3.367 |
| 618.6 | MLCL_58:8  | 12.89 | ± | 2.525 | 25.38 | ± | 7.544 | 29.26 | ± | 7.995 | 28.87 | ± | 5.757 | 10.66 | ± | 2.847 | 19.58 | ± | 3.881 |

Supplementary Table 5: Criteria for lipid identification for each lipid class include MS mode, molecular ion, scan mode, and fragment (m/z).

| <b>Class</b> | <b>MS Mode</b> | <b>Molecular Ion</b> | <b>Scan Mode</b>        | <b>Fragment (m/z)</b> |
|--------------|----------------|----------------------|-------------------------|-----------------------|
| CE           | pos            | M+NH <sub>4</sub>    | Precursor Ion Scan      | 369.3516              |
| Cer          | pos            | M+H                  | Precursor Ion Scan      | 264.2686              |
| DAG          | pos            | M+NH <sub>4</sub>    | Neutral Loss Scan       | -FA                   |
| GLY          | pos            | M+H                  | Precursor Ion Scan      | 264.2686              |
| LPC          | pos            | M+H                  | Precursor Ion Scan      | 184.0733              |
| PC           | pos            | M+H                  | Precursor Ion Scan      | 184.0733              |
| LPE          | pos            | M+H                  | Neutral Loss Scan       | -141.0109             |
| PE           | pos            | M+H                  | Neutral Loss Scan       | -141.0109             |
| TAG          | pos            | M+NH <sub>4</sub>    | Neutral Loss Scan       | -FA                   |
| LPA          | neg            | M-H                  | Product Ion Scan        | FA                    |
| PA           | neg            | M-H                  | Product Ion Scan        | FA                    |
| LPG          | neg            | M-H                  | Product Ion Scan        | FA                    |
| PG           | neg            | M-H                  | Product Ion Scan        | FA                    |
| LPI          | neg            | M-H                  | Product Ion Scan        | FA                    |
| PI           | neg            | M-H                  | Product Ion Scan        | FA                    |
| LPS          | neg            | M-H                  | Product Ion Scan        | FA                    |
| PS           | neg            | M-H                  | Product Ion Scan        | FA                    |
| CL           | neg            | M-2H                 | Isotope Peak [M-2H+0.5] |                       |

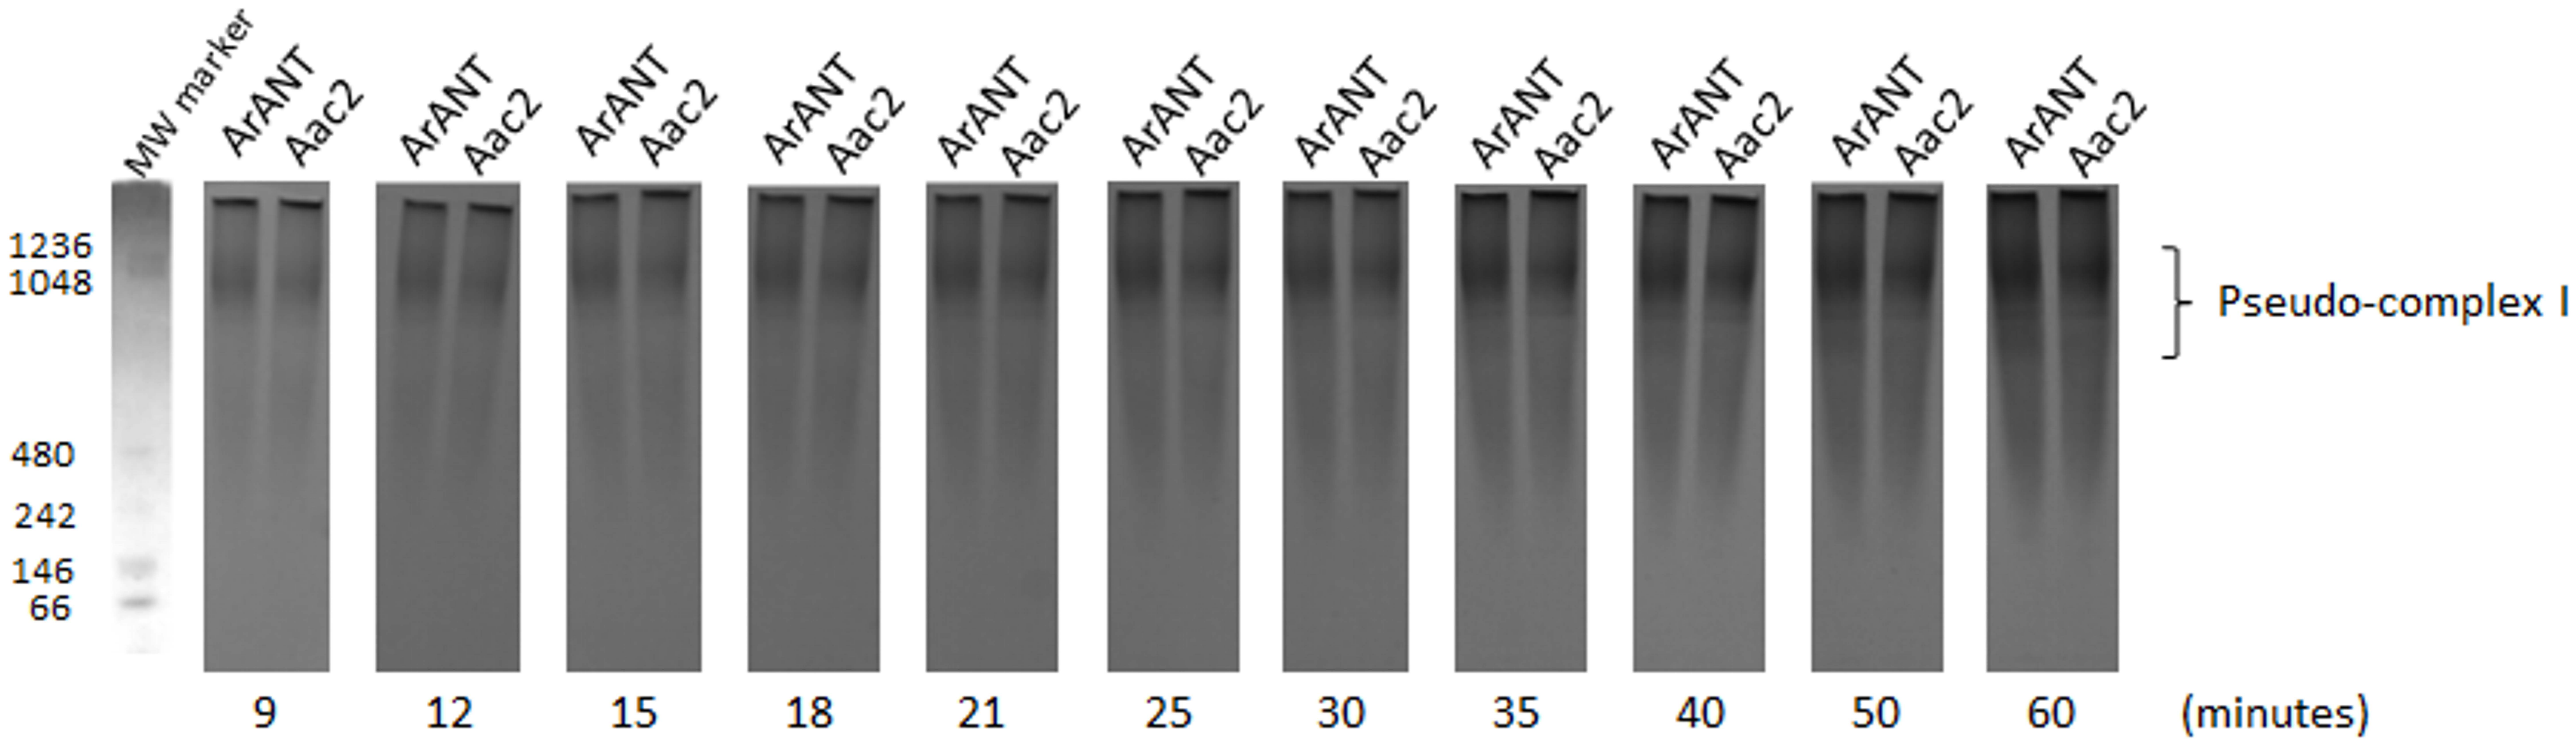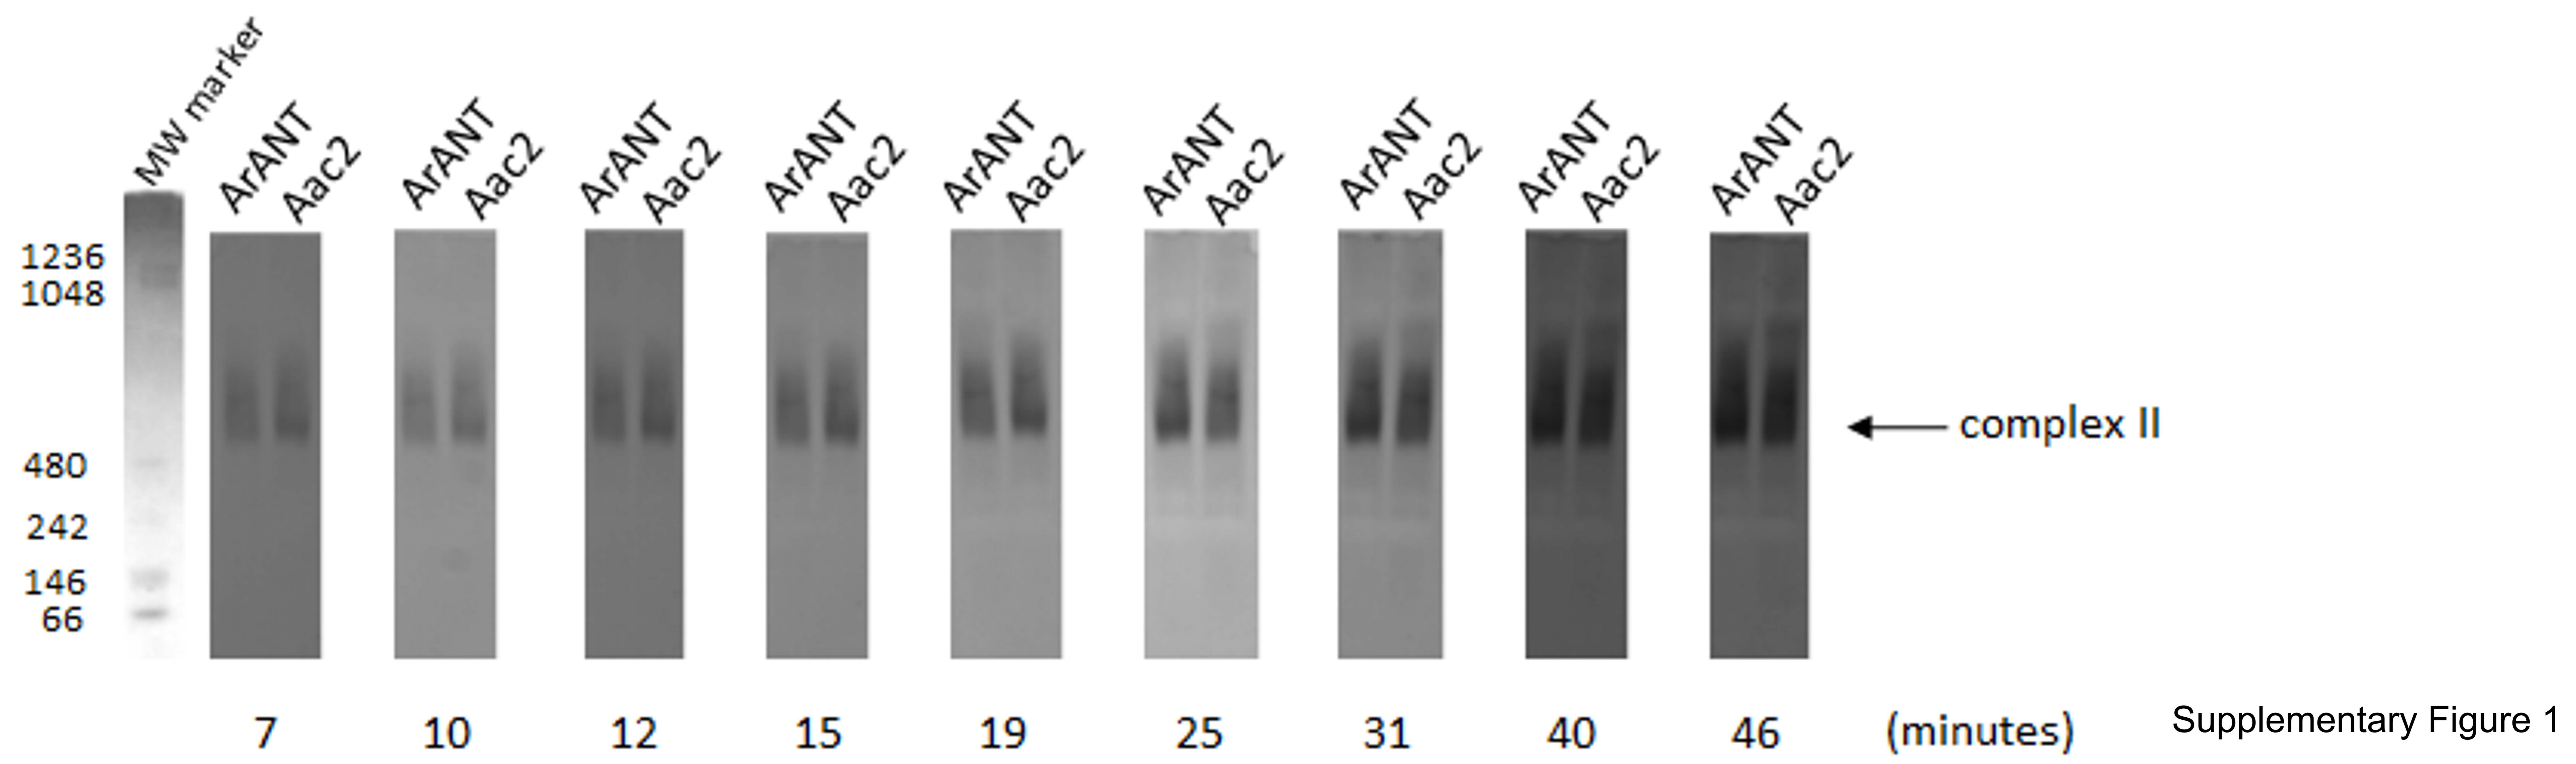

**Legend to Supplementary figure 1:** Time-lapse of in-gel pseudo-complex I (top series) and complex II (bottom series) activities. Solubilized mitochondrial complexes (400  $\mu$ g) were separated by clear-native polyacrylamide gel electrophoresis (CN-PAGE). Gels were incubated with appropriate reagents (see Materials and Methods) to visualize the activities of NADH dehydrogenases Nde1, Nde2 and Ndi1 (collectively referred to as pseudo-complex I) or succinate dehydrogenase (CII). Activity products were imaged using a standard flatbed scanner. The gel-lane scan on the top-most left corner is a molecular weight ladder (NativeMark™ Unstained Protein Standard, Thermofisher Sci, imaged at a different contrast and saturation level), to which all gel scans shown in the series can be compared to (MW marker image of both top and bottom series is the same, as these were performed sequentially). In left lane, mitochondria expressing ArANT were loaded, and in the right lane those obtained from Aac2. Incubation times are indicated in the bottom of each panel.
